# Supplementary material for: Association between quarantine and sleep disturbance in Hong Kong adults: The mediating role of COVID-19 mental impact and distress
Source: Frontiers journal article supplement (doi:10.3389/fpsyt.2023.1127070), 2023-02-28
Supplement: Data_Sheet_1.xls [file Data_Sheet_1.xls]

## Sheet: Additional file 1
Supplementary Dataset	Volume 14 - 2023	doi: 10.3389/fpsyt.2023.1127070	Association between quarantine and sleep disturbance in Hong Kong adults: the mediating role of COVID-19 mental impact and distress
RespondentID	i1_wkedu	i2_relationship	i3_social	i4_leisure	i5_health	i6_finance	i7_food	i8_sex	p1_think	p2_danger	p3_angry	p4_notdeal	p5_images	p6_otherworry	p7_sleep	p8_numb	p9_sad	p10_concentrate	p11_physx	p12_excess	p13_topics	p14_notsafe	p15_routine	p16_outcome	p18_motivate	p19_news	p20_exhausted	p22_notrelax	p24_lonely	p25_trap	p26_decision	p27_otherexpect	psqi1a	psqi1b	psqi2a	psqi2b	psqi3a	psqi3b	psqi4a	psqi4b	psqi5a	psqi5b	psqi5c	psqi5d	psqi5e	psqi5f	psqi5g	psqi5h	psqi5i
13008078179	2	2	2	2	2	2	2	1	2	2	1	1	1	3	2	1	2	2	1	1	1	2	1	2	1	2	1	1	1	1	1	1	9	30	0	15	6	0	5	0	2	3	3	3	2	2	2	2	2
12947569293	4	2	4	4	3	2	1	1	3	2	2	4	4	2	3	3	4	3	4	3	2	2	3	3	3	1	2	3	4	4	4	1	1	0	1	0	6	30	3	0	3	3	2	1	1	2	2	3	3
13013032308	1	1	2	4	1	1	1	3	3	5	5	4	2	1	5	5	4	4	1	3	1	4	2	3	4	1	3	4	2	3	3	4	1	0	0	30	7	50	6	30	4	2	1	1	1	1	1	3	1
12901610507	3	1	3	5	1	1	1	1	5	5	4	4	5	2	2	4	3	3	1	1	4	5	3	2	4	2	3	3	3	3	5	2	1	30	0	30	10	30	8	30	2	4	4	2	1	3	3	1	1
12903811197	2	1	2	3	1	1	1	1	3	5	1	1	1	1	1	3	1	1	1	1	1	1	1	2	1	2	1	1	3	2	1	3	23	30	0	10	8	0	7	0	1	1	2	1	1	2	1	1	1
12900957934	4	3	4	4	2	1	1	1	3	3	3	4	1	1	2	2	2	3	1	4	1	3	2	2	5	1	3	3	4	4	4	2	12	0	0	30	9	0	8	0	2	3	1	1	1	1	1	2	1
12900191593	3	3	3	3	2	3	3	1	4	2	2	1	2	1	2	3	3	1	1	1	2	2	1	1	2	3	1	1	1	2	2	2	12	0	0	10	6	30	6	0	1	3	1	2	1	4	1	2	1
12947642038	3	1	2	3	3	2	1	1	1	2	2	2	3	2	1	1	3	5	1	3	1	2	2	2	2	1	2	1	1	1	1	4	1	30	0	10	9	30	6	30	1	1	1	1	1	3	3	3	1
12906050417	3	3	3	4	3	2	4	2	4	4	2	2	3	1	1	2	2	2	1	1	2	4	1	2	2	1	2	1	2	2	2	2	12	0	1	0	9	0	5	15	1	2	1	1	1	1	1	1	1
12909933807	3	1	3	5	1	2	1	2	1	3	1	1	1	1	2	3	1	3	1	3	1	3	2	3	2	1	1	1	1	1	3	2	0	40	0	15	9	0	8	0	2	3	2	1	1	2	1	1	1
13010311788	2	2	4	4	1	1	1	1	4	4	4	4	3	1	4	3	3	3	1	1	1	1	4	4	4	1	4	3	4	4	4	4	11	30	0	30	7	0	3	0	4	3	1	4	1	3	3	1	2
12991857628	2	3	2	2	1	3	4	1	4	5	2	2	2	1	1	4	3	1	1	1	1	3	1	5	3	1	2	1	3	2	1	2	4	0	0	5	8	45	4	30	1	1	1	1	1	1	1	1	1
12991858546	3	2	2	2	1	1	1	1	2	2	2	3	2	2	2	3	2	2	1	1	1	2	2	2	2	2	2	2	2	2	3	3	12	30	0	5	7	10	6	0	2	2	2	1	1	1	1	2	1
12910017354	3	1	2	2	1	2	1	1	3	2	2	3	1	1	1	2	1	2	1	1	2	2	1	2	2	1	2	1	2	2	3	2	1	30	0	15	8	30	6	0	1	1	1	1	1	1	1	2	1
12906534214	3	4	5	3	2	4	1	1	3	3	5	4	2	1	1	3	3	3	1	1	1	1	1	2	1	1	2	1	2	4	1	1	23	0	0	5	8	0	8	0	1	3	3	1	1	1	1	3	3
12906419084	4	4	4	3	4	1	1	1	3	2	4	3	3	1	2	4	3	5	2	4	1	2	1	2	2	1	2	2	4	4	2	3	3	40	0	40	10	0	6	0	3	3	2	1	1	3	2	2	3
12904212884	3	1	3	3	1	2	1	1	1	1	2	2	1	1	4	5	1	1	1	1	1	1	1	1	1	1	1	1	4	1	1	1	3	30	0	45	9	0	6	0	3	1	3	1	1	2	1	1	1
12901227471	3	2	3	4	2	2	4	1	3	2	1	1	1	1	2	3	1	1	1	1	1	1	1	1	1	3	2	2	1	1	2	1	12	15	0	30	9	0	8	0	3	1	1	1	1	3	1	3	1
12900312049	2	2	1	1	2	2	1	1	1	1	2	1	1	1	1	1	2	2	1	1	1	2	1	1	1	1	1	1	2	1	1	2	11	30	0	10	7	30	7	30	2	3	2	1	1	1	1	1	1
12899996698	5	3	3	1	1	1	1	1	3	3	3	4	2	1	2	3	2	4	1	3	1	2	1	2	4	1	4	2	2	3	2	4	12	15	0	15	8	0	7	30	2	2	3	1	1	3	1	1	1
12900000020	3	1	1	2	1	3	2	1	3	2	1	2	2	1	1	2	1	1	1	1	1	1	1	1	1	1	1	1	1	1	1	1	11	30	0	30	9	30	8	0	3	3	3	1	1	1	1	3	1
12899985729	2	2	3	4	2	1	1	1	1	1	1	1	1	1	2	3	3	1	1	2	3	3	1	3	1	1	1	1	3	1	2	2	1	0	0	45	10	0	7	0	4	2	1	1	1	3	1	1	1
12899925647	2	1	1	1	2	1	2	1	1	1	3	2	1	1	3	2	3	3	2	1	1	1	1	1	4	1	2	3	2	2	3	3	12	30	1	0	7	30	7	0	4	4	2	1	1	1	4	1	4
12899784012	2	1	1	1	1	1	1	1	2	2	2	1	2	1	3	3	2	2	1	2	1	1	1	2	2	1	3	3	5	1	2	3	11	30	1	30	6	45	5	30	4	1	4	1	1	3	2	3	1
12899718178	3	4	3	4	2	2	1	1	2	3	4	3	2	2	2	3	2	2	1	1	1	2	1	2	2	1	1	1	1	2	1	2	0	30	0	10	7	0	7	0	2	1	1	1	1	2	1	2	1
13040515470	4	2	3	4	3	2	2	1	3	4	4	3	3	2	2	4	3	2	2	4	2	3	3	3	4	4	2	4	5	3	3	2	2	0	1	30	10	0	5	0	4	3	1	2	2	2	1	1	1
12926116656	3	1	2	1	3	1	1	1	2	3	1	1	1	1	1	3	2	1	1	1	1	1	1	1	1	2	1	1	1	1	1	1	3	0	0	20	10	30	7	0	2	1	1	3	4	3	1	2	4
12904139750	3	1	2	2	1	2	2	1	3	2	2	1	1	1	1	3	3	2	1	1	1	3	1	4	1	2	2	1	2	1	3	1	12	30	0	30	10	30	9	0	4	1	2	1	1	3	3	3	1
12901437477	4	2	3	3	3	2	1	1	2	3	3	4	3	2	3	4	2	3	1	1	1	2	1	2	2	1	3	3	4	3	2	2	1	0	0	30	9	30	7	0	2	1	1	1	1	1	2	2	1
12901402826	2	1	2	3	1	2	3	1	2	2	2	2	1	1	1	3	2	2	1	2	1	1	1	1	3	1	4	4	1	5	3	1	3	0	0	5	1	0	8	30	1	2	3	1	3	3	2	1	2
12991868097	1	1	1	1	1	1	3	1	2	3	3	3	2	1	4	4	1	3	1	1	1	1	3	1	2	1	1	3	1	3	3	4	12	0	1	0	7	0	5	0	4	3	2	3	1	4	3	4	2
12991857876	3	5	2	2	2	3	1	1	4	4	4	4	5	3	5	5	5	5	4	3	3	3	4	3	4	3	5	4	5	4	3	3	1	45	0	15	7	30	7	0	2	2	2	1	2	3	3	2	1
12991858635	3	2	3	4	1	2	2	1	2	1	2	2	2	1	1	2	2	2	1	1	1	1	1	2	2	1	1	1	2	2	2	2	3	0	0	5	8	0	3	0	1	1	1	1	1	1	2	2	1
12945910382	2	1	3	3	1	1	1	1	1	2	2	2	1	1	1	1	1	1	1	2	2	2	2	1	1	1	1	1	1	1	1	1	1	30	0	15	10	0	8	0	2	1	1	1	1	1	1	1	1
12917010942	2	1	2	3	2	1	1	1	2	4	4	2	2	2	1	3	2	1	1	1	1	4	1	4	3	2	2	4	2	1	2	1	1	30	0	5	8	0	6	30	1	3	3	2	3	3	1	4	1
12905908789	3	2	1	3	2	3	1	1	2	2	2	2	1	1	1	2	1	2	1	3	1	1	1	2	3	1	1	1	1	2	1	1	2	0	0	10	7	30	6	0	1	1	1	1	1	1	1	1	1
12903504372	2	2	2	4	2	3	3	1	2	4	3	2	2	1	2	3	2	2	1	2	1	2	1	3	3	4	2	2	2	3	3	3	3	0	0	30	12	0	7	0	3	2	1	1	1	2	3	3	1
12900632129	3	4	3	3	4	2	1	1	3	4	3	3	3	3	2	4	3	3	1	2	2	2	2	2	2	2	2	2	2	3	1	2	1	0	0	5	7	30	6	30	1	2	1	1	1	1	2	1	1
12900372873	3	1	2	4	2	2	4	1	3	4	3	3	3	2	2	3	1	3	2	1	2	3	1	3	3	3	4	2	2	4	3	2	1	0	0	20	7	45	6	25	2	1	2	1	1	1	4	1	1
12900378127	2	2	3	2	3	2	3	1	4	4	4	4	4	2	2	3	4	4	2	3	3	4	2	2	3	2	3	3	3	3	4	3	11	15	0	10	6	30	7	0	1	2	2	1	1	1	3	3	1
12900097971	3	1	3	2	2	1	1	1	1	1	2	1	1	1	1	1	2	1	1	1	1	2	1	2	2	1	2	1	2	1	2	1	12	30	1	0	9	30	8	0	3	3	3	3	3	4	1	1	1
12947388657	3	4	2	4	3	2	2	1	4	3	4	3	2	2	3	4	2	3	1	1	1	2	1	2	2	1	2	1	3	3	2	1	12	0	0	15	9	0	8	0	3	3	1	2	1	2	3	2	2
12906053763	3	2	3	3	1	1	1	1	2	2	1	1	1	1	1	2	2	1	1	2	2	2	1	1	1	1	1	1	1	1	1	1	12	40	0	15	8	0	7	0	2	3	1	1	1	3	1	1	1
12904445153	3	1	4	4	3	4	1	2	4	4	5	4	5	2	4	3	2	3	1	1	4	4	2	2	4	4	5	5	5	4	5	3	4	30	3	0	2	30	8	30	4	3	2	2	1	4	4	4	3
12903581465	3	2	3	2	1	1	1	1	2	2	2	2	2	1	1	3	2	1	1	1	2	2	1	3	1	1	1	1	1	1	1	1	11	30	0	8	7	30	7	30	1	1	1	1	1	3	1	3	1
12903282979	3	1	2	3	1	1	1	1	1	1	2	3	1	1	1	2	1	2	1	1	1	2	2	1	1	2	1	2	1	3	1	2	12	0	0	3	7	0	7	0	1	1	1	1	1	1	2	1	1
12900238963	2	1	1	1	1	1	1	1	1	2	1	1	1	1	1	2	1	1	1	3	1	1	1	1	3	1	1	2	1	1	2	1	2	0	0	30	11	0	6	0	3	1	1	1	1	2	2	1	1
12947379051	3	3	4	4	3	2	2	1	3	3	3	3	2	2	3	3	2	3	2	1	3	3	2	2	2	2	3	2	2	2	3	2	11	50	0	30	7	50	6	30	3	2	1	1	1	1	2	1	3
12908329698	3	3	2	3	1	1	1	1	2	3	2	2	3	1	1	2	1	2	2	1	2	3	2	4	2	2	1	2	1	1	1	1	11	0	0	30	8	0	10	0	3	3	2	1	1	1	3	1	1
12902536427	3	1	2	2	1	2	1	1	3	2	1	3	3	1	1	4	1	2	1	1	1	1	1	2	1	2	1	2	1	2	1	3	1	30	0	30	9	0	6	0	3	1	2	1	1	3	3	2	1
12901213906	2	2	3	4	1	1	1	1	2	3	3	2	2	1	1	2	2	1	1	1	1	2	1	2	2	1	2	1	1	2	1	1	12	30	1	30	7	40	6	0	4	2	2	1	1	2	3	2	1
12900263094	2	1	1	1	1	2	1	1	2	2	1	1	1	1	2	1	1	2	1	1	1	1	1	1	1	1	1	1	1	1	1	2	1	0	1	10	10	0	7	30	4	1	2	1	3	1	1	2	1
12899904314	2	1	1	2	4	1	1	4	1	1	3	2	1	1	1	4	2	2	1	3	1	1	1	1	2	1	2	2	1	2	1	1	11	25	2	0	8	0	7	0	3	2	1	1	1	1	3	1	1
13015962523	3	3	3	3	2	2	1	1	2	4	3	3	2	2	2	3	3	2	2	2	1	2	2	3	2	2	2	2	1	2	1	1	12	30	0	10	7	30	7	0	2	3	1	1	1	1	1	3	3
12970789777	3	1	3	2	1	1	1	1	2	1	1	1	1	1	1	3	1	1	1	1	1	1	1	1	1	1	1	1	1	2	1	1	23	30	0	10	7	0	7	20	2	1	1	1	1	1	2	1	1
12950208059	3	3	3	3	2	2	3	1	2	2	2	3	1	2	2	4	1	4	1	3	1	1	1	2	2	1	2	1	2	2	1	1	11	45	0	0	7	15	8	30	1	3	2	1	3	4	4	1	1
12949705126	4	2	3	3	2	1	1	1	5	1	2	3	2	1	1	2	3	1	1	1	3	1	1	1	1	1	1	2	2	1	1	1	12	0	0	15	6	0	6	0	3	3	2	1	1	1	2	1	1
12903602791	5	5	1	5	1	1	1	5	3	2	4	2	1	1	1	4	1	3	1	1	1	3	1	2	3	1	2	1	2	1	1	3	4	0	0	10	12	0	7	0	1	2	2	2	1	1	1	1	1
12900464427	3	3	3	3	2	1	1	2	2	4	3	2	1	1	2	3	1	1	1	1	1	3	1	3	1	1	1	1	1	3	1	1	23	30	0	30	8	30	8	0	3	2	1	1	1	2	2	2	1
12900170501	5	5	5	5	4	3	4	4	5	4	5	5	3	5	5	2	5	2	2	2	3	5	2	5	4	1	5	5	5	5	3	5	1	30	1	0	9	30	7	0	4	3	3	1	1	3	1	4	3
12900129020	3	3	3	3	3	2	2	1	3	3	3	3	3	3	2	3	3	3	2	2	3	3	3	3	3	3	3	3	3	3	2	3	1	30	0	10	10	0	8	0	1	2	2	1	1	1	2	2	1
12900109267	3	2	3	3	1	1	1	1	2	3	1	2	1	1	1	3	1	1	1	1	2	1	1	1	1	3	2	1	1	3	1	2	12	30	0	5	7	50	7	0	1	1	1	1	1	2	1	1	1
12899964800	3	1	2	4	1	1	3	1	2	2	2	1	1	1	2	4	1	2	1	1	1	2	1	1	2	1	1	1	1	1	2	1	1	0	0	20	7	0	5	0	1	1	1	1	1	1	1	1	1
12899158273	3	2	2	4	3	1	2	1	4	3	3	3	3	2	4	5	4	3	1	2	2	3	2	1	3	3	3	4	5	5	3	4	2	30	0	5	11	45	6	30	3	2	1	1	1	1	1	3	1
12956162152	3	3	3	4	2	3	3	2	3	3	3	3	2	1	3	4	1	1	1	1	1	1	2	2	1	2	2	2	2	5	2	1	12	30	0	15	8	10	4	0	3	4	3	2	1	2	2	4	3
12950511340	1	1	1	1	1	1	1	1	1	2	2	2	1	1	1	2	2	1	1	1	1	1	1	1	1	1	1	1	2	3	1	1	10	30	0	5	6	5	7	0	1	1	4	1	1	1	1	1	1
12947478536	2	2	2	2	3	1	1	3	2	3	3	2	2	1	2	5	2	3	2	1	1	2	1	1	3	3	3	3	2	1	3	1	11	0	0	30	6	55	6	0	3	4	1	3	1	2	3	3	3
12900092280	3	4	4	3	2	1	3	1	3	4	4	4	2	3	3	4	3	2	2	2	2	2	2	4	2	1	1	2	1	5	3	2	12	10	0	20	8	10	8	0	2	2	1	2	2	1	2	4	2
12899787566	3	2	2	3	2	1	1	1	3	3	1	2	2	1	3	2	3	2	1	2	1	2	1	2	3	2	2	2	2	2	2	2	2	45	0	30	10	0	7	0	3	3	2	1	1	2	2	3	3
13019632639	3	2	2	4	2	2	2	1	2	3	2	2	1	1	2	3	1	1	1	1	1	1	1	2	1	1	1	1	1	3	1	1	1	0	0	30	8	30	7	30	3	2	3	1	1	1	3	2	1
13008453621	1	3	4	3	4	2	1	4	3	3	1	1	1	1	1	1	2	1	1	1	1	2	1	1	2	1	1	1	1	3	1	1	1	0	1	0	7	0	6	0	3	2	1	1	1	1	1	1	1
12952698191	1	3	2	2	2	1	1	2	2	3	1	2	1	1	2	2	2	1	1	1	2	1	1	1	1	2	1	1	1	2	2	2	0	45	2	0	7	36	7	30	2	1	1	1	1	1	1	1	1
12950068517	3	3	4	4	1	1	1	1	3	2	2	2	2	1	1	2	2	2	1	2	1	1	1	1	1	1	1	1	3	2	3	3	11	30	0	30	6	15	6	30	2	3	3	2	3	1	2	2	1
12902978184	3	2	4	3	1	1	1	1	1	2	1	1	1	1	1	2	2	1	1	1	1	1	1	1	1	2	1	1	2	1	1	1	11	20	0	10	6	30	7	0	2	2	3	1	1	2	2	1	1
12900545152	3	1	2	3	1	1	1	1	2	2	2	2	2	1	1	2	2	2	2	2	1	2	2	2	2	2	2	1	1	2	1	2	23	0	2	0	9	0	7	0	3	2	1	1	1	1	3	3	1
12900370722	5	5	4	4	4	5	4	1	4	4	5	5	4	3	5	2	4	3	2	5	2	4	2	5	4	3	5	3	4	4	4	4	1	15	0	15	7	45	6	15	3	3	1	3	1	4	1	3	1
12900024072	5	5	5	4	3	5	2	5	4	3	4	3	2	2	5	3	5	4	1	3	3	5	4	3	5	3	5	5	5	4	4	2	0	30	1	20	7	40	6	30	4	3	3	1	3	2	2	1	1
12899151247	5	3	2	5	3	2	1	5	5	4	4	4	5	2	4	5	4	1	1	4	2	1	3	5	2	5	5	3	3	5	2	1	2	0	0	30	11	0	1	30	3	1	3	1	1	1	2	1	1
12952878154	5	4	5	4	4	4	1	4	2	5	3	4	4	5	4	2	5	3	1	1	1	1	3	3	1	1	5	2	1	5	1	1	11	0	1	0	7	0	6	0	4	4	3	1	1	3	4	2	3
12948080240	3	1	3	4	2	3	4	2	3	4	3	2	4	2	1	3	2	2	1	1	2	2	1	3	2	1	1	2	2	4	2	2	12	0	0	5	7	30	7	30	1	2	1	2	2	1	3	3	2
12920292140	4	4	5	5	2	1	1	1	4	1	3	2	3	1	1	4	3	2	1	3	3	1	2	1	3	1	4	2	5	4	3	2	3	0	1	0	7	45	3	0	2	2	1	3	1	3	4	1	1
12903588257	4	2	2	3	1	1	4	1	3	4	2	1	2	1	2	2	3	1	1	1	2	2	1	2	1	2	2	1	1	1	1	1	12	45	0	15	10	0	9	0	3	3	1	1	1	2	2	1	1
12900098011	2	1	2	4	1	4	1	1	2	1	1	1	2	1	1	3	2	1	1	1	1	1	1	2	1	1	1	1	1	2	1	1	12	40	0	15	8	0	7	0	1	1	2	1	1	1	2	1	1
12899811271	4	2	3	2	2	3	1	1	4	3	1	2	2	1	3	3	3	3	2	3	1	1	1	1	1	1	1	1	3	1	3	2	11	45	0	10	7	0	7	0	1	3	1	1	1	1	1	1	1
13013651809	1	1	1	4	1	1	1	1	2	1	1	1	1	1	1	1	1	1	1	1	2	1	1	1	1	1	1	1	1	1	1	1	12	30	0	5	7	15	2	0	1	1	2	1	1	1	2	2	1
12949381548	3	2	2	3	2	1	1	1	1	1	2	2	1	1	2	2	2	1	1	2	1	1	1	1	1	1	2	2	2	3	1	1	1	30	0	20	7	20	5	30	3	4	4	2	1	3	3	2	3
12948336341	4	3	1	2	1	4	2	1	2	2	3	3	2	1	1	2	2	3	1	1	2	3	1	1	1	1	3	1	1	4	3	1	3	30	0	30	10	30	7	0	4	4	1	1	4	4	4	2	4
12908287351	4	5	5	4	4	3	4	1	3	5	4	3	2	2	2	2	1	3	1	2	1	5	2	4	1	5	2	5	2	3	1	1	12	0	2	0	11	0	7	0	4	4	3	1	1	1	3	3	1
12900043584	3	1	1	4	3	2	3	1	3	4	5	1	3	1	4	4	3	3	2	2	1	3	1	2	1	2	2	3	1	5	2	1	11	30	0	30	8	0	7	0	2	2	1	3	1	1	2	4	1
13009964604	2	3	2	2	2	2	1	1	4	3	2	2	2	1	2	4	2	2	1	2	1	3	2	2	2	1	2	2	1	4	2	2	4	50	0	20	13	30	6	30	4	3	3	3	2	1	2	4	1
12899980685	1	1	1	1	5	1	1	5	1	1	1	1	1	1	1	1	1	1	1	1	1	1	1	1	1	1	1	1	1	1	1	1	22	30	0	30	7	30	8	0	1	1	1	1	1	1	1	1	1
13013038633	4	1	2	5	2	3	2	1	2	3	2	2	3	1	1	2	3	2	1	1	2	2	1	1	1	1	1	1	2	1	1	2	24	0	0	10	7	0	6	45	1	1	3	1	1	1	1	1	1
12991857086	1	4	1	5	1	5	1	5	4	5	1	1	5	3	5	1	1	2	1	5	5	5	5	5	4	4	2	2	2	2	2	2	24	50	3	0	9	0	3	0	4	4	1	1	1	1	3	1	1
12949551926	3	1	2	3	2	2	2	1	2	2	2	1	1	2	1	4	2	1	1	2	2	1	2	2	1	1	1	1	1	1	1	1	11	0	1	0	6	0	5	0	4	3	2	2	1	3	4	3	2
12908655770	5	2	4	5	5	2	2	1	4	2	4	4	4	1	1	4	2	4	2	4	1	3	3	4	4	1	2	4	4	5	5	2	12	30	0	30	10	0	10	0	3	1	1	1	1	1	3	3	1
12900258330	3	2	1	1	2	1	1	2	2	4	2	2	1	1	1	2	2	1	1	1	1	1	1	2	1	1	1	2	2	3	1	4	10	45	0	5	9	30	9	30	3	2	1	1	2	1	3	4	1
12900027227	4	3	1	4	1	4	1	1	3	3	1	2	2	1	2	3	1	1	1	1	1	1	1	1	1	2	1	2	2	1	2	2	0	45	0	10	9	10	7	30	3	3	4	1	1	2	2	1	1
12899896201	2	2	3	1	1	1	1	1	3	4	2	1	1	2	2	3	1	1	1	1	1	1	1	2	2	1	3	2	2	1	4	2	23	30	0	30	7	0	7	0	2	1	1	3	3	1	1	3	1
12899888825	3	1	3	2	1	1	1	1	2	1	1	1	1	1	1	3	1	1	1	1	1	1	1	1	1	1	1	1	1	1	1	1	0	0	0	30	8	30	7	0	2	1	1	1	1	2	2	3	1
12899801680	2	2	1	2	1	2	2	1	2	1	2	2	2	2	3	2	3	2	2	2	3	2	2	2	2	2	1	2	2	2	2	2	11	30	0	10	6	50	8	0	1	2	1	1	2	1	1	1	1
12991858213	2	1	1	5	1	1	1	1	4	5	1	3	3	1	1	3	1	1	1	1	1	1	1	1	3	1	1	1	1	3	1	1	12	30	0	45	7	0	6	0	4	3	4	1	1	4	4	1	3
12991857562	1	2	3	1	2	1	1	1	5	3	3	2	3	3	3	2	1	2	3	4	2	2	3	3	4	2	4	3	4	2	4	2	2	0	0	15	6	30	6	0	3	3	3	4	4	2	2	1	1
12904716156	5	3	5	4	5	2	3	5	2	3	4	5	2	1	5	5	4	5	5	5	4	5	1	2	4	2	3	5	5	5	4	5	6	0	0	0	3	0	9	0	4	4	3	3	2	2	3	2	1
12900570940	3	3	3	3	1	1	1	1	2	3	1	1	1	1	1	1	2	1	1	1	1	2	1	1	1	1	1	1	2	1	1	1	2	0	0	10	9	30	7	30	2	1	1	1	1	1	1	1	1
12900250954	2	2	3	5	4	3	4	4	4	4	4	2	5	4	4	3	4	4	4	5	2	5	2	5	4	2	4	4	4	4	2	5	0	0	2	0	9	0	7	0	4	4	1	2	1	3	4	3	2
12991859608	3	1	2	3	2	2	2	1	2	4	3	5	2	3	1	4	2	2	3	2	3	1	1	4	3	2	2	2	2	4	3	1	1	0	0	30	8	0	7	0	1	1	3	1	1	1	3	1	1
12903332982	2	2	2	3	2	2	2	1	2	2	2	2	2	1	1	3	2	2	1	1	1	1	1	1	1	3	1	1	1	2	1	2	12	30	0	10	6	45	6	0	1	1	1	1	1	4	1	1	2
12901245851	4	2	3	3	2	1	1	1	3	3	2	3	3	1	1	3	2	2	2	1	1	2	1	2	2	1	1	3	2	4	2	1	2	0	0	30	11	0	8	30	3	1	1	2	1	2	2	2	1
12900126931	2	1	1	3	1	1	1	1	2	2	3	1	2	1	2	3	3	3	1	3	2	1	1	2	3	3	2	2	3	2	4	3	1	0	0	10	9	0	7	45	3	3	1	1	1	1	3	1	1
12991857154	1	2	2	4	3	3	1	2	1	1	2	3	3	1	2	2	1	2	1	1	2	1	1	3	2	2	3	2	2	2	3	1	11	0	0	8	7	0	6	0	3	4	1	1	1	1	1	2	1
12991862023	3	2	5	3	3	2	3	1	3	4	2	3	2	3	4	2	2	2	1	1	1	2	2	2	4	2	2	3	3	2	3	3	2	0	3	0	11	0	1	0	4	3	3	2	2	2	4	3	2
12911633360	3	2	2	3	2	2	2	1	2	2	2	1	2	1	1	1	1	1	1	1	1	2	1	2	2	1	1	1	1	1	1	1	2	30	0	30	11	0	9	0	3	1	1	3	1	3	1	2	2
12899950782	2	1	2	4	1	1	1	1	1	3	1	1	1	3	1	3	1	1	1	1	1	1	1	1	1	5	1	1	1	1	1	1	1	0	0	0	8	30	7	30	1	1	1	1	1	1	1	1	1
12991857744	4	3	4	3	2	2	2	1	3	3	2	1	3	2	1	4	2	2	1	1	1	2	1	2	2	2	3	1	3	2	3	2	0	15	0	20	8	30	8	0	2	4	1	1	4	4	3	1	1
12991858664	3	1	1	2	1	1	1	1	2	2	1	1	1	1	1	3	1	1	1	1	1	1	1	1	1	1	1	1	1	1	1	1	3	0	0	30	10	0	8	0	3	3	1	1	1	1	3	1	1
12900239221	5	3	5	5	5	5	5	5	4	5	1	1	1	1	1	5	1	1	1	1	1	5	1	1	4	1	1	5	3	3	1	5	12	30	0	20	7	15	6	0	3	3	1	3	1	3	4	3	3
12900124340	3	3	3	3	4	3	3	1	4	3	3	2	2	2	4	3	2	3	1	1	1	2	1	2	2	1	2	2	2	2	3	3	12	0	1	30	8	0	6	0	4	3	1	3	3	1	1	1	2
12908473092	3	3	3	4	1	2	3	1	2	2	3	2	1	1	2	2	2	2	1	2	1	2	2	1	2	3	2	2	2	2	2	2	1	30	0	15	9	15	6	30	2	3	3	1	3	3	4	1	3
12903021869	2	1	2	2	1	1	1	1	1	2	2	1	1	1	1	1	1	1	1	1	1	2	1	1	1	1	1	1	2	1	1	3	23	30	2	0	8	0	8	0	4	3	1	1	2	1	3	3	1
12901750372	5	2	2	3	2	4	1	2	4	2	3	2	5	2	1	3	4	2	1	4	3	4	1	3	4	1	3	2	3	5	4	4	6	0	0	30	15	0	8	0	3	1	1	1	1	1	3	1	1
12900085987	2	1	1	2	1	1	1	1	2	2	1	1	1	1	1	2	1	1	1	1	1	1	1	2	1	2	1	1	1	1	1	1	11	30	0	15	8	0	8	0	1	1	1	1	1	1	1	1	1
12910852416	4	2	3	3	2	3	1	1	3	3	3	3	3	2	1	4	3	2	1	1	3	2	2	3	4	2	4	2	3	3	4	2	3	50	0	10	9	45	5	15	1	3	1	2	2	1	1	3	1
12902880471	1	1	3	3	1	1	1	1	2	4	1	2	3	1	1	1	2	1	1	1	1	4	1	3	1	4	1	1	3	1	1	1	11	44	0	10	7	55	8	45	2	1	3	1	1	1	1	4	1
12900239337	4	2	4	4	2	3	2	1	3	3	3	2	2	2	1	5	5	3	1	1	3	4	1	3	3	4	2	2	3	3	3	2	11	0	0	15	7	30	6	30	2	2	2	1	2	1	1	2	1
12869515962	3	3	4	3	2	3	1	2	3	4	3	2	3	2	3	2	3	3	2	1	2	4	3	2	3	3	2	3	3	3	3	2	0	15	0	30	8	15	7	30	4	2	1	1	3	3	3	3	4
12911111204	1	1	1	2	1	1	1	1	1	1	2	1	1	1	1	2	1	1	1	1	1	1	1	1	2	1	2	3	1	2	2	1	1	30	0	10	9	0	6	30	2	4	3	1	1	1	3	1	1
12899981744	2	3	3	4	3	3	2	1	3	3	2	3	1	1	1	3	2	1	3	1	1	3	1	3	1	3	3	2	2	3	2	3	1	30	0	10	8	30	6	30	1	1	1	1	1	1	1	1	1
13015780196	4	2	3	4	1	3	1	1	3	2	1	2	2	1	2	4	2	1	1	2	1	1	1	2	1	1	1	1	2	4	1	1	12	30	0	30	7	30	7	0	3	3	3	1	1	4	2	2	2
12939538059	3	5	4	5	4	1	1	1	3	5	5	4	4	4	1	3	2	3	2	2	2	4	3	4	4	2	3	4	2	4	3	3	1	0	0	30	8	0	7	0	3	3	3	2	3	4	2	3	3
12900021370	4	1	4	3	1	1	1	1	3	3	2	2	3	1	1	2	2	1	1	1	1	3	1	3	2	2	2	2	1	1	1	1	2	0	0	15	7	10	5	0	3	3	2	1	3	1	3	1	1
12902821928	5	2	3	4	3	3	2	2	3	2	1	2	1	1	3	2	3	4	1	2	1	2	3	2	4	2	2	2	1	2	3	3	1	0	0	20	7	15	5	0	2	3	2	1	4	2	3	2	1
12894860582	1	1	2	2	1	1	1	1	2	1	1	1	1	1	1	1	1	1	1	1	1	1	1	1	1	1	1	1	1	1	1	1	11	0	0	5	7	0	8	0	1	1	1	1	1	1	1	1	1
12949327993	4	3	4	4	3	2	2	2	2	3	2	2	2	3	1	2	2	1	1	4	1	2	1	3	1	1	1	1	1	1	1	4	1	0	0	30	6	30	5	30	2	3	2	1	2	1	3	1	1
12956111832	5	4	4	3	4	2	4	1	4	4	5	5	3	3	2	2	3	3	1	1	1	3	3	2	4	3	4	4	4	5	3	1	11	30	0	30	6	0	6	0	4	3	3	2	3	4	1	2	4
12947424465	3	2	3	4	2	1	1	1	2	1	4	2	1	1	4	4	3	3	1	1	2	2	2	2	2	2	3	2	1	3	2	3	11	30	0	10	6	30	7	0	2	3	3	1	1	2	2	3	1
13010206718	2	2	2	2	2	2	2	1	2	2	1	1	1	1	1	1	1	1	1	1	1	1	1	1	1	1	1	1	1	1	1	2	10	10	0	10	6	10	7	30	2	4	4	1	1	1	1	1	1
12948189583	3	2	3	1	1	1	1	1	1	1	1	1	1	1	1	1	1	1	1	1	1	1	1	1	1	1	1	1	1	1	1	1	11	0	0	5	9	0	9	0	1	3	1	1	1	1	3	1	1
12949108499	3	3	3	3	3	2	2	3	3	3	3	2	2	2	2	1	1	2	1	1	1	1	1	2	1	1	1	2	2	2	2	1	10	30	0	15	5	45	6	45	3	3	3	1	3	2	2	4	3
13010168364	2	3	4	4	2	1	1	1	2	2	2	1	1	1	1	1	1	1	1	1	1	1	1	1	1	1	1	1	1	1	1	1	10	30	0	7	7	0	7	0	3	3	3	1	1	1	3	1	2
12899989823	2	2	3	3	1	1	1	3	3	2	1	3	2	1	1	4	3	2	1	1	1	2	1	2	1	1	2	1	2	2	1	1	1	0	0	5	7	20	6	0	1	3	1	1	1	1	1	1	1
13050803478	1	1	3	3	4	1	1	1	2	1	2	2	1	1	2	3	2	1	1	1	2	1	1	2	3	1	2	3	3	5	3	3	1	30	0	30	7	30	6	0	4	3	1	3	1	2	1	3	1
13016487176	2	1	2	3	1	1	2	1	1	2	1	1	1	1	1	4	1	1	1	1	1	1	1	1	1	1	1	1	1	1	1	1	11	0	0	10	7	30	7	0	2	4	3	2	1	2	3	2	1
13015840209	3	2	1	4	3	1	2	1	1	3	5	5	2	2	5	3	2	4	2	2	1	2	2	2	4	1	5	3	5	5	3	1	3	0	0	30	7	0	0	30	4	3	1	4	3	1	1	4	4
13013056969	2	1	1	2	1	1	2	1	2	2	1	1	1	1	1	2	2	1	1	1	1	1	1	1	1	1	1	1	1	1	1	1	12	0	0	45	6	45	6	0	4	4	3	1	1	1	2	2	1
13010432615	3	2	3	2	2	2	2	4	3	1	5	5	1	2	4	4	2	2	1	1	1	1	1	2	2	1	4	2	4	2	3	2	1	50	0	0	11	30	10	0	4	2	1	1	2	1	4	3	4
12947971471	3	3	4	4	1	1	1	1	2	3	1	1	1	1	1	1	1	1	1	1	1	2	1	1	1	1	1	1	1	1	1	1	1	0	0	15	7	15	6	0	3	1	2	1	1	1	1	1	1
12947360019	3	3	4	4	3	2	2	1	2	3	3	2	1	1	1	4	2	1	1	2	1	3	2	2	2	1	1	2	1	3	1	2	23	0	0	30	7	0	7	15	2	2	2	2	1	1	4	2	2
12900279155	3	2	4	3	1	1	2	1	3	3	2	4	2	3	3	4	3	3	1	2	3	3	2	2	4	2	2	2	4	5	4	3	12	30	1	0	7	30	6	0	4	3	2	1	1	1	1	3	2
12900095833	3	3	3	4	4	3	3	3	4	3	3	3	3	3	3	3	3	3	3	2	3	3	2	3	2	3	3	3	3	3	3	2	11	30	0	30	8	0	6	0	4	4	4	4	3	3	3	4	1
12900090266	1	1	1	1	1	1	1	1	1	1	1	1	1	1	1	1	1	1	1	1	1	1	1	1	1	1	1	1	1	1	1	1	23	45	0	1	6	45	7	0	1	1	1	1	1	1	1	1	1
12900004783	3	4	5	5	5	3	3	1	3	4	3	2	3	1	1	3	2	2	1	2	1	2	1	3	3	1	2	1	2	4	2	3	12	0	0	15	7	10	7	0	3	3	3	4	2	4	4	2	4
12899941816	3	1	2	3	1	2	1	1	2	2	2	3	2	1	1	4	2	1	1	1	3	2	1	2	2	1	2	1	1	3	2	1	11	30	1	0	7	0	6	30	3	1	2	1	1	2	2	1	1
12899920007	5	5	5	4	4	5	1	1	4	4	4	5	4	3	2	4	4	3	1	3	3	3	3	3	3	3	3	2	4	4	3	5	10	0	2	0	7	30	6	0	4	1	1	1	1	1	1	2	1
12899925293	3	2	3	4	3	3	2	2	2	4	3	3	3	2	2	3	2	3	2	2	2	2	2	2	2	3	2	2	2	2	1	3	11	30	0	15	6	45	7	0	2	3	1	1	1	2	2	1	1
13010523253	3	1	1	3	2	2	1	1	2	1	2	2	2	1	2	3	2	2	1	1	1	1	1	1	2	1	2	2	1	3	1	1	2	0	0	10	8	0	5	30	1	1	3	1	1	1	1	3	2
12914906109	5	1	2	3	1	4	2	1	2	2	2	2	2	1	2	2	2	1	1	1	1	2	1	2	2	1	1	1	1	1	1	1	12	0	0	15	7	45	7	0	3	2	1	1	1	1	3	1	1
12899980726	3	3	4	4	1	2	1	1	2	3	2	1	1	1	1	3	2	1	1	1	1	2	1	2	1	1	3	1	1	1	1	1	11	45	0	5	7	0	7	30	2	3	3	1	3	1	1	1	1
12899913159	2	1	2	5	2	1	1	1	2	3	1	1	1	1	1	1	1	1	1	1	2	2	1	1	2	2	1	1	1	1	1	1	11	0	0	5	6	45	6	30	1	4	3	1	1	1	2	1	1
12899715558	3	2	1	4	1	2	1	1	1	2	2	2	3	1	1	3	2	1	1	2	1	3	1	3	4	1	3	1	1	4	1	1	10	30	0	30	6	30	7	30	3	3	2	2	4	1	3	3	1
13009062232	3	2	4	3	3	3	1	1	1	2	4	5	1	1	5	5	3	5	1	1	1	2	2	2	4	1	5	5	5	5	5	4	1	30	1	30	8	0	7	0	4	3	3	3	4	3	4	3	3
12978803020	2	1	3	2	1	1	1	1	2	2	2	2	3	2	3	2	2	2	1	1	1	2	1	3	2	1	2	2	2	2	2	1	11	30	1	0	7	40	6	0	4	4	4	2	2	2	4	2	3
12949743471	3	1	1	4	2	2	2	1	1	2	2	1	1	1	1	1	1	1	1	1	1	1	1	1	1	2	1	1	1	1	1	1	0	30	0	30	8	0	6	0	3	2	1	1	1	1	1	1	1
12948790384	4	3	3	5	2	4	4	1	2	3	4	3	3	1	4	3	3	2	2	1	2	1	1	2	3	2	2	1	2	3	1	2	3	0	0	30	11	0	7	0	3	3	1	1	1	3	4	3	3
12947750933	4	1	3	4	4	3	3	1	3	3	3	3	3	1	1	4	3	3	1	3	3	2	1	3	3	1	1	2	4	2	2	1	21	0	0	10	6	50	9	0	2	4	3	3	1	1	1	3	1
12899980374	2	2	3	3	3	4	3	2	3	3	3	2	2	2	2	2	2	2	2	1	3	2	2	2	3	2	2	2	2	2	2	2	23	30	0	30	7	30	6	0	3	3	3	3	2	3	3	2	2
12899941936	2	3	4	5	2	1	5	1	2	5	1	1	1	1	1	1	1	1	1	1	1	3	1	4	1	1	1	1	1	1	1	1	11	0	0	10	7	0	8	0	1	4	4	1	1	3	3	1	1
13010433884	4	3	2	3	3	2	1	2	3	4	3	4	3	3	3	3	3	3	2	2	2	3	2	2	3	2	3	2	2	3	3	2	11	0	0	15	7	15	7	30	3	3	3	1	3	1	1	2	3
13010307940	3	2	5	5	5	1	1	5	4	4	3	3	4	1	2	1	4	3	1	1	1	3	1	4	2	2	2	2	4	4	4	3	10	30	0	30	7	0	8	0	4	4	4	4	1	2	3	4	3
12947947435	2	3	4	4	4	3	4	2	1	2	3	2	1	1	1	4	2	1	1	1	1	2	1	1	3	1	1	1	1	3	3	2	1	0	0	15	7	0	6	0	1	1	1	1	1	2	1	1	1
12903229500	3	2	4	4	4	2	2	1	3	4	5	3	2	3	3	3	2	3	2	2	1	4	2	3	4	3	3	4	4	4	4	2	11	30	0	25	7	0	6	45	3	4	3	3	2	1	3	4	1
12900331907	2	1	1	4	1	1	1	1	2	2	1	1	1	1	1	2	1	1	1	1	1	1	1	1	1	1	1	1	1	1	1	1	0	0	0	5	6	0	6	0	1	2	1	1	1	1	1	1	1
12899967118	1	1	1	2	3	1	2	1	1	3	2	1	2	1	1	1	3	3	1	1	1	3	1	3	1	1	2	1	1	1	2	1	23	15	0	10	7	0	7	0	3	4	4	3	3	2	4	2	1
13016250716	3	4	2	4	3	3	2	1	3	4	3	2	2	1	2	3	1	3	1	1	3	1	2	3	3	3	3	3	3	3	1	1	22	30	1	0	6	30	6	0	3	3	1	2	1	4	1	1	1
13015793681	4	4	4	4	2	4	1	1	4	4	3	3	4	4	2	3	3	3	3	1	2	4	4	4	4	3	3	4	2	3	2	2	12	0	0	10	6	15	6	0	3	3	3	1	4	1	1	2	3
13015779262	2	2	4	4	3	3	4	2	4	4	3	3	3	4	3	1	2	2	1	1	1	2	1	3	2	1	2	2	2	2	2	2	23	0	0	30	7	0	7	0	3	3	3	1	1	1	1	3	3
13011130029	3	1	4	4	4	1	3	1	1	2	3	3	1	1	5	1	3	2	3	2	1	3	1	5	5	1	2	5	3	4	2	1	1	0	0	15	7	30	6	0	1	4	4	1	3	1	2	1	1
13008208634	3	3	3	3	3	1	2	3	4	4	4	3	4	3	3	3	2	3	4	1	1	4	2	5	3	4	3	3	3	3	4	2	12	0	0	30	7	0	6	0	3	4	4	3	2	3	3	2	3
12899944077	4	1	3	4	2	1	1	1	3	2	2	1	1	1	1	2	2	2	1	1	1	2	1	1	3	1	2	2	4	4	1	1	10	30	0	10	5	45	7	0	2	3	1	1	1	1	1	2	1
12899960533	5	2	2	4	4	2	1	2	2	2	3	4	3	2	1	2	2	2	1	1	1	3	1	5	3	1	4	3	1	2	1	2	2	30	0	10	7	30	5	0	1	2	1	1	2	3	1	2	1
13136418957	5	4	5	5	4	1	2	1	3	1	4	4	1	1	2	3	5	4	1	1	1	1	2	1	3	1	4	3	4	2	4	3	11	0	0	5	7	0	9	0	3	1	4	3	3	4	3	3	1
13008507488	3	1	3	3	3	1	3	1	3	1	5	3	2	1	1	3	3	3	1	3	1	2	1	2	1	1	2	3	4	3	5	5	3	0	0	10	7	30	4	15	1	2	1	1	1	2	2	2	2
13008293498	4	3	4	4	3	3	2	4	3	3	3	3	3	1	2	1	3	2	1	1	1	2	2	3	1	1	2	2	4	3	1	1	11	0	0	20	7	30	7	10	2	3	1	1	1	2	3	4	3
12951160470	4	5	3	3	1	1	1	1	1	2	2	2	2	1	3	1	2	2	1	1	1	2	2	3	1	1	1	1	2	1	2	2	0	0	1	30	9	0	6	0	4	4	3	1	1	1	4	2	1
12949558445	4	3	4	4	1	4	3	2	4	3	2	1	2	1	1	2	2	1	1	1	1	2	1	3	2	2	1	2	2	2	2	2	11	30	0	15	7	0	7	0	2	1	3	1	1	1	2	1	1
12949513312	1	1	1	1	1	1	1	1	2	2	1	1	1	1	1	1	1	1	1	1	1	1	1	1	1	2	1	1	1	1	1	1	11	0	0	10	6	0	7	0	2	2	1	1	1	1	1	1	1
12949314924	3	3	4	4	4	3	1	2	3	3	3	3	3	2	3	3	2	3	2	3	2	2	2	2	2	2	2	2	2	2	2	2	1	0	0	30	9	30	5	0	3	2	2	2	4	2	3	2	3
12947797096	2	3	3	3	2	1	2	1	1	2	2	1	1	1	1	3	1	1	1	1	1	2	1	2	2	1	1	1	1	2	1	1	11	0	0	15	6	30	7	0	1	1	1	1	1	1	1	2	1
12940872879	2	2	3	3	2	1	1	1	2	1	2	2	2	1	1	2	2	2	1	2	1	1	1	2	2	2	1	2	1	4	2	1	12	30	0	15	7	15	7	0	2	1	1	1	1	2	4	1	2
12903067399	3	4	4	4	3	1	4	1	3	4	4	3	4	3	3	2	3	3	2	2	3	3	3	4	2	1	2	3	1	3	3	2	12	30	0	5	7	40	7	0	3	3	3	1	2	3	2	3	3
12900024329	1	2	3	3	1	1	1	1	2	3	2	3	2	3	1	2	2	1	1	1	1	3	2	4	3	1	1	2	1	3	2	1	1	15	0	10	7	30	5	45	2	3	1	1	1	1	1	1	1
12899915089	3	1	1	4	1	1	1	1	1	1	3	2	1	1	1	4	1	1	1	1	1	1	1	1	3	1	1	1	3	3	3	1	12	15	0	15	7	30	6	30	3	3	3	1	1	1	1	1	1
13052139818	2	1	2	4	3	1	1	1	1	1	2	2	1	1	1	3	2	2	1	1	1	1	1	2	2	1	1	1	1	2	1	1	11	0	0	30	8	0	8	0	1	1	1	1	1	2	1	2	3
13013038536	3	4	3	3	3	2	3	1	3	2	3	1	1	1	2	1	2	2	1	1	2	2	2	2	1	1	2	1	2	2	1	1	22	30	0	30	7	25	8	0	1	3	4	1	4	4	3	2	4
13011493839	1	1	1	3	3	1	1	5	3	1	1	2	1	1	1	3	1	1	1	3	1	1	1	1	1	1	1	2	2	1	1	1	11	30	0	15	7	0	7	0	2	2	3	1	1	1	3	1	1
13010550134	2	2	2	2	2	1	2	2	3	3	2	2	2	2	2	3	1	1	1	1	1	2	1	2	2	2	2	2	2	2	2	2	1	30	1	0	7	20	5	30	4	2	2	3	4	2	2	2	2
12976893569	5	3	5	5	1	1	1	1	1	4	1	2	2	1	1	1	1	1	1	1	1	3	1	1	1	3	2	1	1	3	1	1	12	0	0	15	7	0	6	30	1	4	1	1	1	3	1	3	1
12950512900	5	5	5	5	5	5	5	5	4	5	5	5	5	5	5	5	5	5	5	5	5	5	5	5	5	5	5	5	5	5	5	5	1	0	1	0	6	0	5	0	4	4	4	4	3	4	4	4	4
12949719753	2	3	3	4	2	3	1	1	3	3	3	5	3	2	3	4	2	2	1	2	2	3	2	2	4	1	4	2	2	3	3	3	2	0	1	0	7	30	5	30	3	2	1	1	1	1	2	3	1
12902789121	3	2	4	4	2	2	2	1	2	2	2	1	1	1	2	2	2	2	1	1	1	3	1	1	1	2	1	1	1	1	1	2	11	30	0	15	6	15	7	0	1	3	1	1	1	1	1	3	1
13019380135	2	1	2	2	1	5	1	1	1	1	1	1	1	1	1	3	1	1	1	1	1	1	1	2	2	1	1	1	1	1	1	1	12	0	0	15	6	30	6	30	1	2	3	1	1	3	1	1	1
13019063575	3	4	3	3	4	2	2	2	3	4	4	4	4	5	3	3	3	3	2	2	2	2	2	4	3	3	3	3	3	3	3	3	22	0	1	0	5	30	8	0	3	3	2	1	1	2	3	3	3
13015799543	2	1	1	4	1	1	2	2	1	2	2	2	1	2	1	1	1	1	1	2	1	2	1	2	2	1	1	2	2	2	1	2	1	0	0	3	7	0	6	0	1	1	1	1	1	1	1	1	1
13014497134	2	2	3	2	1	2	1	3	2	2	2	1	1	1	2	1	1	2	1	1	1	1	1	1	1	1	2	2	2	2	1	1	12	0	0	30	7	0	4	0	4	4	2	1	1	2	1	2	1
13010473211	4	4	3	3	4	4	4	4	4	4	5	5	5	5	4	4	4	4	4	3	2	5	3	5	4	3	5	4	4	4	4	5	1	0	0	30	6	30	4	0	3	2	2	3	4	4	3	4	4
12978724450	4	2	3	4	1	1	2	4	3	4	3	3	3	1	2	3	3	3	2	1	3	3	1	3	2	3	3	2	2	3	2	3	11	0	0	20	6	40	7	0	2	4	4	1	1	1	3	3	3
12965959020	4	3	4	4	3	3	3	1	3	4	3	2	2	2	2	3	2	2	2	3	1	2	2	2	1	3	1	2	2	2	2	3	0	30	1	0	6	40	6	0	4	3	1	1	4	1	1	3	1
12947428385	4	2	2	2	3	5	4	1	4	5	5	5	4	2	5	3	3	3	2	3	2	5	2	5	3	3	2	5	4	4	4	3	22	30	2	0	6	45	4	0	3	4	2	1	3	1	1	3	3
12899913666	5	3	4	5	4	3	5	1	4	1	2	1	1	1	1	2	3	1	1	1	1	1	1	1	2	1	1	1	1	4	1	1	11	30	1	0	7	0	6	30	4	3	3	1	1	1	1	3	4
13010701934	2	2	3	2	3	2	3	1	3	3	2	2	2	1	2	2	1	2	1	1	1	2	1	2	2	1	2	2	2	2	1	1	22	30	0	15	6	50	8	0	1	2	3	1	3	2	3	2	2
13008145477	2	2	2	2	1	1	1	2	1	2	1	1	1	2	1	1	1	1	1	1	1	1	1	1	1	1	1	1	2	2	1	1	11	30	0	5	4	0	4	30	1	4	1	1	1	1	1	2	1
13008019313	4	1	3	4	1	1	1	1	2	2	2	2	1	1	4	4	3	1	1	2	1	2	1	1	1	1	1	1	1	1	1	1	12	0	0	1	7	45	7	45	1	4	4	4	4	4	3	3	3
12955867367	3	2	4	4	3	4	2	1	2	2	1	1	2	1	1	2	2	2	2	1	1	2	1	2	2	1	2	1	1	3	2	2	1	30	0	30	6	15	5	0	2	1	1	1	1	1	1	2	1
12948243527	4	4	4	3	4	1	1	2	4	4	4	4	3	2	2	2	2	3	3	1	4	3	3	2	3	1	3	3	2	4	2	1	0	0	0	30	8	15	7	0	2	3	4	4	1	2	4	1	1
12900222259	4	3	3	3	2	2	2	2	2	3	2	2	2	2	2	2	2	2	1	1	1	1	1	2	1	1	1	1	1	1	1	2	1	0	0	45	8	0	7	0	1	4	3	2	2	2	2	1	1
12900075104	3	4	3	3	2	2	3	2	2	2	2	3	2	1	2	2	2	2	1	2	1	1	1	1	2	2	2	2	2	2	2	2	1	30	0	10	8	30	7	0	1	4	4	1	1	3	3	1	1
12899852102	4	2	3	3	2	3	2	1	4	4	3	3	3	2	3	3	3	2	2	1	2	3	1	2	2	2	1	2	4	3	3	3	22	0	0	30	6	30	6	0	4	4	3	1	2	2	3	2	1
12899848370	3	3	3	3	2	3	1	1	1	1	1	1	1	1	1	4	3	2	1	1	1	1	1	1	1	1	1	1	1	1	1	1	10	30	0	5	6	30	7	30	2	4	1	1	1	1	2	2	4
13010924127	3	1	2	3	3	3	1	1	2	2	1	1	1	1	1	1	1	1	1	1	1	1	1	1	1	1	1	1	1	1	1	1	12	0	0	10	9	0	8	0	2	4	3	1	1	1	1	3	1
12899945255	3	4	3	2	3	1	2	3	3	4	3	3	2	2	3	2	2	2	2	1	3	3	2	2	2	1	2	2	3	3	2	2	11	0	0	30	6	10	7	0	3	3	3	1	1	1	1	1	1
13087668055	3	4	3	4	2	1	2	2	3	3	3	2	2	1	1	3	2	1	1	1	1	3	1	2	2	1	1	2	1	2	2	3	1	0	1	0	6	45	5	0	3	3	2	1	1	2	2	3	4
13014936243	2	1	3	4	2	1	1	1	2	2	1	1	1	1	1	2	1	1	1	1	1	2	1	2	1	1	1	1	1	1	1	1	11	30	0	15	6	5	5	30	3	3	3	2	3	1	2	2	1
13008484052	2	1	2	3	1	2	1	1	2	1	1	2	1	1	1	1	1	2	1	1	1	2	2	2	1	1	2	2	2	1	2	2	12	30	0	15	6	30	6	0	3	2	2	1	2	2	3	3	2
12952664920	1	1	2	1	1	1	1	1	1	3	2	1	1	1	2	1	1	1	1	1	1	1	1	1	1	1	1	1	1	1	1	1	10	30	0	10	4	0	6	0	1	4	2	1	4	3	4	1	4
12949812214	2	5	1	3	2	1	1	1	1	2	1	2	1	1	1	1	2	2	1	1	1	1	1	1	2	2	2	1	1	1	2	2	10	0	0	30	5	30	7	0	3	3	3	1	2	1	2	1	2
12949663398	4	2	4	5	3	2	4	1	3	3	3	3	1	1	1	4	3	2	1	1	2	3	1	2	3	1	3	2	2	1	1	1	12	30	0	15	6	30	5	0	2	4	3	1	3	3	3	2	2
12949585683	4	3	3	4	2	1	3	1	1	2	2	2	1	1	1	1	1	1	1	1	1	2	1	2	1	1	1	1	1	2	1	1	23	30	0	30	7	0	7	0	2	3	3	2	2	1	1	2	2
12947910883	3	3	3	3	3	3	4	3	3	3	3	3	3	2	4	2	2	2	3	3	4	4	4	3	3	4	2	3	3	3	2	2	22	0	2	0	6	0	5	50	2	3	2	2	2	2	1	1	2
12947555016	2	2	2	3	3	2	2	2	2	2	1	3	2	1	1	3	4	3	2	2	2	2	3	3	2	3	2	2	2	4	2	2	1	0	0	10	8	0	7	0	2	2	2	1	1	2	2	3	2
12903582995	3	2	2	2	1	3	1	1	2	2	1	1	1	1	1	1	1	1	1	2	1	1	1	2	1	1	1	1	1	1	1	1	12	0	0	15	8	0	7	30	2	3	1	1	1	1	1	1	1
12900625615	3	2	3	3	1	1	2	1	3	3	2	3	3	3	3	3	3	3	3	2	2	3	1	2	2	3	3	3	3	3	1	3	10	30	0	30	6	20	6	0	3	4	3	1	1	3	3	1	3
12900067334	1	1	1	1	1	1	1	1	1	2	1	1	1	1	1	2	1	1	1	1	1	1	1	1	1	2	1	1	1	1	1	1	10	30	0	5	6	25	7	50	1	1	1	1	1	1	1	1	2
13008584033	3	1	4	4	2	1	2	1	2	4	3	3	4	2	1	2	3	2	2	2	2	3	1	2	2	3	3	2	2	2	2	3	10	45	0	15	6	30	7	0	2	3	3	1	3	4	3	4	1
12949556600	4	3	5	5	1	1	3	1	4	4	1	2	1	1	1	3	3	1	1	1	1	3	1	3	2	5	1	1	3	4	2	3	23	30	0	5	7	18	7	30	2	3	2	1	1	2	1	1	1
12948376484	3	1	3	4	1	3	3	1	3	1	1	2	2	3	1	2	1	1	1	1	1	1	1	1	2	1	2	1	1	2	1	2	1	3	0	10	8	0	6	0	3	3	3	1	1	2	2	1	1
12947491703	3	3	2	2	1	2	1	1	3	4	1	2	2	3	1	3	2	2	1	2	1	3	2	4	2	2	2	1	3	2	2	2	11	30	0	30	6	30	6	0	3	4	1	1	2	2	3	2	3
12900026338	3	4	4	4	3	3	1	1	3	4	3	3	3	3	3	4	2	2	2	2	3	4	3	3	3	2	5	2	2	3	2	2	11	0	0	20	7	0	6	30	3	3	1	1	4	1	1	1	3
13015948927	2	1	3	3	3	1	2	1	2	3	1	1	2	2	2	2	2	2	1	1	1	2	1	3	3	2	2	2	1	2	1	1	11	30	0	15	6	15	6	0	2	3	3	1	3	4	2	3	3
12925522282	5	5	4	5	5	3	1	5	3	3	2	2	1	1	5	5	2	5	1	5	1	2	2	2	4	3	5	2	5	5	3	3	1	30	2	0	8	30	5	0	4	4	4	1	1	1	4	3	4
12899970083	2	3	4	3	2	1	3	1	4	3	1	1	1	1	2	2	2	1	1	2	3	2	1	3	1	1	2	2	1	3	2	1	10	30	0	45	7	20	7	0	4	4	1	1	1	1	1	2	2
13034592883	2	1	2	2	2	1	1	1	2	2	1	1	2	1	1	1	2	1	2	1	1	2	1	2	1	1	2	1	1	2	1	1	12	0	0	8	6	30	6	0	1	3	3	2	1	2	1	1	1
13013178622	3	3	3	2	1	1	1	2	1	1	1	2	1	1	1	2	2	1	1	1	1	1	1	2	2	1	2	2	2	1	1	2	10	0	0	15	5	15	7	0	1	2	1	1	2	1	2	1	1
13008259120	1	1	2	2	1	1	1	3	1	1	2	1	1	1	2	5	1	1	2	1	1	1	1	2	2	1	2	1	2	2	1	5	10	30	0	15	4	45	6	0	2	3	3	1	1	1	4	2	2
12951486771	2	2	2	2	2	2	1	1	2	2	2	2	1	1	2	1	1	1	1	1	1	1	1	1	1	1	1	1	2	2	1	1	11	30	0	15	6	45	6	30	3	3	3	2	3	2	3	3	4
12949343495	3	3	3	4	3	1	2	1	3	4	4	3	4	1	2	2	3	2	1	1	2	2	1	3	2	1	1	2	4	4	3	1	23	30	0	5	5	45	5	30	1	4	1	3	3	2	1	2	1
12947399291	2	2	1	3	1	1	2	2	1	2	1	1	2	1	2	1	2	1	1	1	1	2	1	2	1	1	1	2	2	3	1	1	11	0	0	30	7	0	7	30	3	2	2	1	1	2	4	3	4
12950005485	4	3	3	3	3	3	4	3	3	3	3	3	3	4	3	3	3	2	2	2	3	3	1	4	2	2	3	3	2	2	2	3	12	30	0	15	7	15	6	0	4	4	3	3	4	2	2	4	4
12949603118	4	4	3	3	2	1	2	2	3	2	2	2	1	1	2	1	2	1	1	1	1	1	1	2	1	1	2	2	2	2	1	2	10	0	0	15	5	0	7	0	1	2	1	1	2	1	2	1	1
12947353491	2	1	1	1	2	1	1	1	1	2	1	1	1	1	1	1	2	2	1	1	2	2	1	3	1	1	2	2	1	1	3	1	11	30	0	30	4	30	5	0	3	2	1	3	1	2	2	2	4
12900034399	3	4	4	3	5	5	3	1	3	4	5	3	4	4	5	3	4	3	5	3	3	5	5	5	4	3	4	5	1	2	4	3	10	30	3	0	8	30	5	30	4	4	4	4	4	4	3	4	4
12899884242	3	4	3	3	3	4	3	4	3	2	4	3	2	2	4	3	3	3	2	2	2	2	2	2	2	2	2	3	3	3	3	3	12	30	0	30	7	10	5	0	4	4	3	2	1	2	2	2	2
13022575989	2	1	2	3	1	1	2	1	1	3	1	2	2	1	1	2	1	1	1	1	1	2	1	2	1	3	1	1	1	1	1	1	0	30	0	10	8	30	8	0	1	3	2	1	3	2	2	2	2
13016011405	1	1	2	2	1	1	1	1	1	2	1	1	1	1	1	2	1	1	1	1	1	1	1	1	1	1	1	1	2	1	1	1	12	30	0	10	7	30	6	30	1	3	3	1	1	1	3	1	1
13015768001	3	4	3	3	3	2	3	1	2	2	1	2	2	1	2	2	1	1	1	2	1	1	1	2	2	1	2	1	4	2	2	2	12	30	0	20	7	20	7	0	3	3	3	3	2	2	2	2	1
12958997439	3	3	2	2	2	2	2	1	2	1	4	4	2	1	2	1	2	3	1	1	1	1	1	1	4	2	4	4	4	4	4	4	23	30	0	10	6	15	6	0	1	2	1	1	3	1	4	1	1
12953110434	2	3	1	1	2	1	1	1	2	1	2	1	1	2	1	2	2	1	1	1	1	2	1	2	2	1	1	1	3	1	1	1	11	0	0	15	7	0	7	0	2	2	3	2	1	2	3	1	2
12950933796	3	1	2	2	1	1	3	1	2	2	1	1	1	1	2	3	2	2	1	2	1	2	1	2	1	1	1	2	2	1	2	2	0	0	0	30	6	0	5	0	3	3	3	1	1	1	1	2	3
12947411023	2	1	1	1	1	1	1	1	1	1	2	1	1	1	1	1	1	1	1	1	1	1	1	1	1	1	1	1	1	1	1	1	11	0	0	30	7	0	7	0	2	2	2	1	1	1	1	1	1
12900009965	4	2	3	3	3	4	3	2	3	3	3	2	3	2	4	3	3	3	1	2	2	2	1	2	3	2	2	2	2	3	2	1	3	30	1	0	10	0	4	0	1	3	2	2	1	1	2	2	1
13015778400	3	3	4	3	3	1	2	1	2	2	3	3	2	1	4	1	2	3	2	3	2	3	2	2	3	1	3	2	4	4	3	4	12	30	0	30	7	30	6	0	3	4	4	2	3	3	3	4	4
13008813468	3	2	2	2	1	1	2	1	2	3	1	1	1	1	2	2	1	1	1	1	1	1	1	1	1	1	1	1	1	1	1	2	12	0	0	5	6	0	6	0	2	3	2	3	1	1	1	2	1
12949653804	5	5	5	5	5	5	5	5	5	5	5	5	5	5	5	5	5	5	5	5	5	5	5	5	5	5	5	5	5	5	5	5	12	30	1	0	3	0	2	0	4	4	4	4	4	4	4	4	4
13015778125	3	4	3	3	1	2	2	1	2	2	3	2	2	2	2	1	1	1	1	1	1	2	1	2	1	2	1	2	1	1	2	2	1	30	0	15	6	30	5	0	3	1	4	2	2	2	2	2	2
13008075993	1	1	3	3	2	4	2	1	2	1	5	3	2	1	4	4	1	1	1	2	1	3	1	3	2	2	3	3	2	4	3	3	11	0	2	0	8	0	5	0	4	4	4	4	4	3	4	1	4
12949888326	3	3	4	4	3	3	4	2	4	3	2	2	1	1	2	4	2	2	1	1	1	1	1	2	2	3	2	2	2	3	2	1	12	30	0	10	6	15	6	0	2	3	1	1	2	3	3	3	2
12949774523	3	3	5	5	4	3	3	3	5	5	5	5	5	5	5	3	4	4	4	3	4	5	4	4	5	3	4	4	5	5	5	5	9	30	2	0	6	10	3	0	4	4	4	4	2	2	2	3	3
12947820701	3	4	2	2	2	2	2	3	2	2	2	2	2	4	2	2	2	2	1	1	1	2	2	2	2	2	2	2	2	2	2	4	24	30	0	30	6	30	5	30	2	3	1	1	2	1	2	4	2
12947513799	4	2	5	5	5	1	1	2	3	2	4	2	3	2	5	1	4	3	2	1	1	1	2	3	2	3	3	3	2	1	2	1	10	30	0	60	6	0	6	0	4	4	3	3	1	4	4	1	2
12947344658	3	5	4	3	3	1	1	1	3	2	4	3	1	1	3	3	3	2	1	1	1	3	1	2	2	1	3	3	3	3	2	2	10	0	0	30	7	0	6	30	3	3	2	1	1	1	1	3	1
12947349500	4	4	3	3	2	4	2	2	3	3	4	4	4	4	4	4	4	4	4	4	4	4	4	4	4	4	4	4	4	4	4	4	10	0	3	0	5	35	5	35	4	4	4	1	2	2	3	2	2
12900078574	4	5	4	4	3	5	1	4	4	3	3	3	1	2	2	3	3	3	1	1	1	3	1	3	2	3	5	2	2	1	1	1	10	0	0	20	7	0	6	0	3	3	4	1	4	1	3	1	2
13015676624	3	2	4	5	2	1	1	1	3	3	2	2	2	1	3	2	2	1	1	1	1	1	1	2	1	1	2	2	2	2	2	2	12	30	0	30	6	30	5	30	2	4	3	1	1	1	3	2	3
13008128230	3	2	4	3	3	1	3	1	2	2	1	2	1	1	2	2	1	1	1	1	1	1	1	1	1	2	2	2	1	1	1	2	1	0	0	5	7	15	6	0	2	1	2	1	3	1	2	2	2
12950921345	2	1	1	1	1	2	1	1	2	1	1	1	1	1	1	1	2	1	1	1	1	1	1	2	1	1	1	1	1	1	1	1	3	0	0	3	8	0	5	0	1	2	2	1	4	3	3	1	1
12950309884	1	1	1	1	1	1	1	1	1	1	1	1	1	1	1	1	1	1	1	1	1	1	1	1	1	1	1	1	1	1	1	1	12	0	0	15	7	30	7	0	2	2	2	1	1	1	1	1	1
12950153807	3	1	4	4	1	1	3	1	2	3	1	1	1	1	1	1	1	1	1	1	1	2	1	3	1	1	1	1	1	2	1	1	12	15	0	15	8	30	8	0	2	3	3	1	1	1	2	2	1
12949526214	3	1	2	1	1	1	2	1	3	2	1	1	1	1	1	1	2	1	1	1	1	1	1	2	1	1	1	1	1	1	1	2	0	30	0	5	6	45	6	0	1	1	1	1	1	1	1	1	1
12900406128	2	2	3	2	1	1	2	1	3	3	1	1	1	1	1	4	1	1	1	1	1	1	1	2	2	3	1	1	2	1	1	1	1	30	0	5	7	30	6	0	1	2	2	1	1	1	3	2	2
12899987191	5	2	1	5	5	1	1	1	1	1	2	1	1	1	5	2	1	3	1	2	1	1	1	1	4	1	4	3	1	1	1	2	2	0	1	0	8	0	3	0	4	4	3	1	1	1	2	1	1
13009887192	3	1	2	2	2	1	1	1	3	2	2	1	2	1	2	2	2	2	1	1	1	2	2	2	1	3	2	1	2	4	2	3	11	0	1	0	6	30	7	0	3	3	3	2	4	3	2	3	3
12950420668	3	3	4	4	3	2	2	2	2	3	2	2	3	3	2	1	3	3	2	1	1	2	2	3	2	1	2	1	1	1	1	1	11	30	0	15	8	0	8	0	1	1	1	1	1	1	1	1	1
12949614228	2	4	3	4	3	3	3	2	3	4	2	3	2	2	4	1	3	2	1	3	1	4	1	4	2	4	2	4	2	4	2	2	11	0	1	0	7	0	6	0	4	4	4	3	4	4	4	3	4
12947955389	1	1	2	3	1	1	1	1	1	1	1	1	1	1	1	1	3	2	1	1	1	2	1	1	2	1	2	1	1	1	1	1	11	30	0	10	7	30	7	0	2	4	3	1	1	1	1	2	2
12947629642	3	2	3	4	3	3	4	1	2	4	1	1	2	1	1	2	3	1	2	1	1	2	1	3	1	1	1	1	2	2	1	1	11	0	0	30	7	30	7	0	3	1	1	1	1	2	2	1	1
12902906481	2	2	2	3	1	1	1	1	1	1	1	1	1	1	1	4	1	1	1	1	1	1	2	1	1	1	1	1	1	1	1	1	2	0	0	10	8	0	6	0	3	1	3	1	1	1	1	1	1
13009023138	3	3	4	4	4	1	4	1	4	4	3	2	3	1	2	1	4	2	2	3	1	2	1	3	2	2	3	2	2	2	2	2	10	0	0	20	5	30	5	0	2	3	3	2	3	2	3	2	2
13016626360	3	3	4	4	3	4	1	1	3	1	2	1	2	1	1	4	2	2	1	4	1	1	1	1	3	3	3	2	3	3	1	1	12	30	0	5	8	0	8	0	2	1	2	1	2	2	2	2	4
13016322199	4	3	3	3	1	1	1	1	2	3	3	3	2	1	1	2	1	2	1	1	1	1	1	2	1	1	2	2	3	2	2	4	12	30	0	1	5	30	5	0	1	4	2	1	4	3	1	4	4
13015464030	1	2	1	2	2	2	2	1	1	2	1	1	1	1	1	2	1	1	1	1	1	1	1	2	1	2	2	1	1	1	2	1	10	0	0	5	5	30	8	0	1	2	2	1	1	2	1	1	1
13014434789	2	1	2	2	2	2	1	1	3	4	2	2	2	1	1	2	1	1	1	1	1	2	1	2	1	2	1	2	2	2	2	2	11	0	0	15	6	0	7	0	2	4	3	1	1	2	3	3	2
13013522608	4	3	4	4	3	2	2	2	3	3	3	3	3	2	3	3	3	3	2	2	2	4	2	3	4	3	4	4	4	3	3	3	12	0	0	30	6	30	6	0	3	4	4	4	4	2	2	2	2
13013308610	2	3	3	3	3	3	3	2	4	3	3	2	3	2	2	2	2	2	2	2	2	3	2	2	2	2	2	2	2	2	2	2	1	30	0	15	8	0	7	0	3	3	3	2	3	3	3	3	3
13013061314	4	3	4	4	3	3	3	4	4	3	3	3	3	2	2	3	3	2	2	1	1	3	2	2	3	2	2	2	1	2	2	2	22	30	1	0	8	0	7	0	4	3	2	2	2	3	2	3	1
13012835076	4	3	4	4	4	4	3	2	4	4	4	4	4	3	2	3	3	4	3	2	2	3	3	3	3	4	3	2	2	2	3	2	8	0	0	20	6	0	5	0	1	3	3	3	3	1	3	3	1
13010498839	3	2	3	3	3	2	1	1	2	2	3	2	2	1	1	2	2	2	1	1	2	2	1	2	2	1	1	1	3	2	2	2	12	0	1	0	7	0	6	30	2	2	3	2	2	2	3	2	2
13008222860	4	1	3	2	1	1	1	1	2	3	2	1	1	2	1	1	2	1	1	1	1	1	1	2	1	1	1	1	1	1	1	1	10	30	0	20	6	30	7	30	2	3	2	1	1	1	2	1	1
12949852063	3	3	4	3	3	3	3	1	2	2	3	2	1	1	1	2	2	2	2	1	2	1	1	1	2	1	1	2	1	1	1	1	12	0	0	30	6	30	6	0	3	3	3	1	1	2	2	2	2
12949601738	5	3	4	4	3	4	1	1	2	3	2	2	2	1	1	2	2	1	1	1	1	2	1	2	3	2	1	1	2	2	2	1	2	0	0	15	8	0	6	0	3	3	3	1	1	1	3	3	1
12947922797	3	2	3	4	1	3	3	1	1	2	1	1	1	1	1	1	1	1	1	1	1	2	1	2	1	2	1	1	1	2	1	1	10	15	0	15	6	0	8	0	1	2	2	1	1	1	2	1	1
12947565474	3	3	3	4	3	4	2	2	2	1	3	1	2	1	1	3	3	2	1	2	1	2	2	3	3	3	2	1	3	3	1	1	12	15	0	15	7	50	0	20	1	2	3	3	3	3	3	2	4
12947460428	1	1	1	2	1	1	1	1	2	3	2	1	1	1	1	1	1	1	1	1	1	2	1	1	1	1	1	1	1	1	1	1	11	30	0	5	6	0	6	0	1	1	4	1	3	1	4	1	1
12910702728	1	1	1	1	1	1	1	1	1	1	2	1	1	1	1	1	1	1	1	1	1	1	1	1	1	1	1	1	1	1	1	1	11	3	0	2	3	0	4	0	1	4	4	1	1	3	4	1	3
12900049648	4	4	4	3	3	2	2	1	2	1	1	2	1	1	2	2	2	2	1	1	1	1	1	2	1	1	1	1	1	1	1	1	12	0	0	30	7	30	1	20	3	3	3	2	2	2	2	2	1
12899992320	2	1	2	3	2	2	1	1	2	2	1	2	2	1	1	1	1	1	1	1	1	2	1	1	2	1	1	1	2	2	1	1	11	30	0	15	7	0	5	0	2	3	2	1	2	2	3	2	2
12899822640	3	1	2	2	1	1	2	1	2	2	1	1	1	1	1	2	1	1	1	1	1	2	1	2	1	1	1	1	1	2	1	1	1	30	0	15	6	10	5	10	2	2	3	1	2	1	2	1	2
13014509753	2	2	3	4	1	2	1	1	2	2	2	1	1	1	2	2	1	1	1	1	1	2	1	2	2	2	1	1	2	2	1	1	12	0	1	0	6	0	4	0	3	4	4	2	2	2	3	3	3
13010341033	3	1	1	3	1	3	1	1	1	1	1	1	1	1	1	1	1	2	1	1	1	1	1	1	1	1	1	1	2	1	1	2	1	0	0	15	8	0	7	0	1	1	2	1	1	1	1	1	1
13010301954	4	3	3	4	2	2	3	2	2	3	3	2	1	3	2	3	4	2	1	1	2	3	1	3	1	3	2	1	1	1	1	2	12	0	0	20	6	15	5	0	2	4	4	1	1	2	3	2	1
12950359947	4	2	3	3	3	1	1	1	2	2	1	1	1	1	1	3	1	1	1	1	1	2	1	2	2	1	2	1	1	1	1	1	11	30	0	10	6	30	6	30	3	2	3	1	3	2	2	2	4
12900335467	4	3	3	4	3	1	1	1	3	1	3	3	1	1	1	4	3	2	1	2	1	2	2	1	2	1	2	1	1	4	1	1	12	0	0	10	7	0	7	0	1	4	1	1	1	4	4	1	1
13010286221	4	2	3	4	3	4	2	2	3	4	2	3	3	2	4	3	2	3	2	1	2	2	2	2	2	3	3	3	4	2	3	2	10	0	1	0	6	0	5	0	2	4	3	1	1	1	1	1	1
12953045625	1	1	1	2	1	1	2	1	1	2	1	1	1	1	1	1	1	1	1	1	1	1	1	1	1	1	1	1	1	1	1	1	11	30	0	30	6	30	5	30	2	4	2	1	1	1	1	1	1
12947687261	2	1	1	1	1	2	2	1	1	1	1	1	1	1	1	1	1	1	1	1	1	1	1	1	1	1	1	1	1	1	1	1	2	0	0	5	9	0	6	55	1	1	1	1	1	1	1	1	1
12947384115	2	2	2	2	3	3	1	1	2	3	2	2	1	1	4	2	2	2	2	2	2	2	2	2	1	2	2	2	1	1	2	2	11	0	0	30	7	0	6	0	4	3	3	3	3	3	3	3	3
12899736246	4	4	4	3	1	1	1	2	3	2	1	1	1	1	1	2	2	2	1	3	1	1	1	2	1	1	1	2	2	4	1	2	12	30	0	15	7	0	6	0	3	4	3	2	4	4	4	3	1
13008606212	3	1	3	3	2	1	1	1	2	1	2	1	1	1	1	2	1	1	1	1	1	2	1	1	1	1	1	1	1	2	1	1	11	0	0	15	7	5	7	0	1	3	4	1	4	2	3	1	2
13008282567	2	2	2	2	1	1	1	1	2	3	1	2	1	1	2	1	1	1	1	1	1	1	1	1	1	1	2	1	1	2	2	2	11	0	0	15	7	0	8	0	2	4	2	2	3	2	3	1	2
12948055498	3	3	4	4	3	3	2	3	2	2	3	2	1	1	2	1	1	2	1	1	1	2	1	1	2	1	1	1	2	2	2	2	12	15	0	15	7	0	6	0	1	4	3	1	3	1	4	4	3
12947920348	3	3	3	4	1	3	3	1	3	2	1	2	2	1	1	2	2	2	1	1	1	2	1	2	1	2	1	1	2	4	3	3	1	0	0	10	8	0	7	0	3	3	4	1	1	1	3	1	4
12903550048	2	2	2	2	2	4	1	1	2	1	2	2	1	1	2	2	3	1	1	2	2	2	1	2	2	1	2	2	2	2	2	2	12	30	0	15	7	15	6	0	1	4	3	1	4	2	4	1	4
13010812638	4	3	4	5	4	4	4	4	3	3	2	2	2	3	3	2	1	2	1	1	2	2	1	3	2	2	1	1	1	3	3	2	11	0	1	0	7	30	7	0	3	4	2	1	4	3	4	1	3
12948116291	3	1	2	3	2	1	1	1	1	1	1	2	1	1	1	3	1	1	1	1	1	1	1	2	1	2	1	1	2	2	1	1	12	45	0	10	7	30	6	30	2	3	2	1	1	1	3	1	1
12947387963	3	3	3	3	3	1	3	1	3	3	3	3	3	3	3	2	3	3	3	3	3	3	3	3	3	3	3	3	3	3	3	3	11	30	1	0	8	0	6	0	4	3	3	1	1	2	4	3	4
12961573421	4	4	4	5	3	2	1	1	3	3	3	2	2	1	2	3	2	1	1	1	1	1	1	2	1	1	1	2	1	1	1	2	1	0	0	20	7	45	6	0	4	3	2	1	1	3	4	2	4
12958835643	3	2	2	4	2	2	2	1	2	1	1	1	2	1	1	3	2	1	1	1	1	1	1	2	1	1	1	1	1	1	1	2	12	3	0	30	6	30	6	0	4	2	3	1	2	3	3	3	1
12948021512	3	2	3	3	2	1	3	3	3	4	2	1	2	1	1	3	1	2	1	1	3	2	1	2	1	2	1	1	1	2	1	2	11	30	0	30	7	0	7	30	2	3	3	1	4	1	3	2	1
13010563400	3	2	3	2	1	1	2	1	2	1	1	1	1	2	1	3	1	1	1	1	1	2	1	2	1	1	1	1	1	1	1	1	11	0	0	5	6	0	6	0	2	3	3	3	3	1	3	2	2
12949848580	3	1	3	3	2	1	1	1	2	2	2	1	2	1	1	2	2	2	1	1	1	2	2	2	2	1	2	2	1	1	2	2	12	30	0	20	7	10	5	0	3	3	3	1	4	3	3	3	4
12947342034	3	1	4	2	1	1	1	1	2	1	2	2	2	1	2	2	1	1	1	1	1	1	1	1	3	1	2	2	1	1	1	1	10	30	0	10	6	30	6	30	1	4	4	1	1	3	3	3	3
12899895543	2	2	3	3	2	1	2	1	2	3	1	1	1	1	2	3	1	1	1	2	1	2	1	2	1	2	2	2	1	3	1	1	11	30	0	30	7	40	7	30	3	2	3	1	2	3	3	1	1
12894571070	3	2	2	2	1	1	1	1	2	2	1	2	1	1	1	2	2	1	1	1	1	1	1	1	1	1	1	1	1	2	1	1	10	30	0	5	6	45	6	0	1	3	1	1	2	1	1	1	1
13029035550	3	1	2	3	1	1	3	1	1	1	1	1	1	1	2	1	1	1	1	1	1	1	1	1	1	1	1	1	1	1	1	1	24	0	0	15	8	0	6	30	2	4	4	1	1	1	1	1	3
12989079755	3	3	3	3	3	1	1	1	3	4	3	3	3	1	3	3	2	3	1	3	1	2	2	3	3	3	3	3	3	3	2	2	1	30	2	0	7	30	4	0	4	3	3	3	4	1	4	3	4
12950193895	3	3	4	4	3	1	2	1	3	2	2	2	2	1	1	2	1	1	1	1	1	2	1	2	1	2	1	1	1	2	1	1	11	30	0	15	7	0	6	0	3	3	4	1	1	1	1	1	2
12949710755	4	4	4	4	1	1	2	1	2	2	2	1	1	1	1	2	3	2	1	1	1	2	1	2	2	1	2	1	2	3	2	1	11	45	0	10	7	30	7	0	2	3	3	1	1	1	1	1	2
12949674420	3	3	4	3	1	1	1	1	4	4	3	2	1	1	1	2	1	1	1	1	1	2	1	1	1	2	1	1	1	1	1	1	11	30	0	30	7	0	7	0	3	2	2	1	1	1	1	1	1
13010430692	2	1	2	2	1	1	1	1	2	1	1	1	1	1	1	1	1	1	1	2	1	1	1	2	1	1	1	1	1	1	1	2	12	0	0	15	7	30	7	0	3	3	3	1	2	1	3	1	1
12953034962	2	1	3	2	1	4	2	1	3	1	1	2	1	1	2	2	1	2	1	2	1	1	1	1	2	1	2	1	2	1	2	2	2	0	0	0	10	0	8	0	3	3	1	1	1	1	1	1	1
12952800377	3	1	3	3	1	1	1	1	3	3	1	1	3	1	1	3	1	1	1	1	1	3	1	3	1	3	1	1	1	1	1	3	11	0	1	0	6	0	7	0	3	3	3	1	3	1	1	2	2
12950063687	5	3	3	4	3	1	1	1	3	3	4	4	4	2	3	3	4	4	1	5	3	3	3	3	3	4	3	3	4	3	3	5	11	15	1	30	7	15	5	0	4	3	1	1	4	4	1	1	4
12899991436	2	2	3	3	1	2	2	3	3	3	2	2	1	2	3	2	1	1	1	1	2	1	1	2	2	2	1	1	2	2	1	1	11	0	0	20	7	0	5	0	3	4	4	1	1	1	2	1	1
12899954383	3	1	2	3	3	1	1	1	2	4	2	3	2	1	2	3	3	2	1	1	2	3	1	5	2	2	3	3	4	3	3	1	12	30	0	15	7	0	5	0	3	4	1	3	1	3	4	1	3
13041094159	2	1	3	3	3	1	1	1	4	3	3	2	2	1	1	3	3	3	3	2	1	2	2	1	3	1	2	3	3	3	2	2	12	0	0	3	6	30	5	30	1	3	2	4	1	2	4	1	4
13016205859	2	1	1	3	2	1	1	1	3	3	1	1	2	1	1	3	1	1	1	1	1	2	1	2	1	1	1	1	2	2	1	1	10	30	0	30	6	30	7	0	3	3	4	1	2	1	3	1	1
13011475947	2	2	2	4	1	2	1	1	2	3	1	2	1	1	2	1	1	1	1	1	1	2	1	2	1	1	1	1	2	1	2	1	1	15	0	15	8	15	6	0	3	3	3	1	2	1	2	1	2
13008303529	2	1	3	3	2	1	2	1	1	1	1	1	1	1	1	1	1	1	1	1	1	1	1	1	1	2	1	1	1	1	1	1	12	30	0	10	8	0	7	0	2	2	1	1	1	1	2	1	2
12950907617	3	2	2	3	1	1	1	1	1	3	1	1	1	1	2	3	1	1	1	1	1	2	1	2	2	2	2	1	2	2	2	1	1	15	0	15	7	30	6	30	3	3	3	1	2	1	1	1	1
13010082660	2	2	1	1	1	1	1	1	2	2	1	1	2	1	1	2	1	1	1	1	1	1	1	2	1	2	2	1	1	1	1	2	12	0	0	10	8	0	7	0	2	4	2	1	3	3	1	2	3
12952706829	4	4	4	4	4	4	4	4	4	4	4	4	4	3	4	4	4	4	4	4	4	4	3	4	4	4	4	5	5	5	5	5	12	0	0	45	4	0	2	0	4	4	4	4	4	3	4	4	4
12949575623	2	1	1	1	1	1	2	1	1	1	1	1	1	1	1	1	2	1	1	1	1	1	1	1	1	1	1	1	1	1	1	1	1	0	0	5	9	0	7	0	2	4	2	1	2	1	1	1	1
12947641504	4	2	3	4	3	3	3	2	3	3	3	3	3	3	4	3	2	3	2	2	2	3	3	3	3	3	2	3	3	2	2	2	2	30	0	10	7	30	3	0	2	3	2	2	4	2	3	3	3
12947511011	2	1	2	1	1	2	1	1	1	1	1	1	1	1	1	2	1	1	1	1	1	1	1	1	1	2	1	1	2	1	1	1	12	30	0	20	8	30	8	0	2	2	3	1	2	2	2	2	2
13010278739	2	2	1	3	1	2	2	1	2	2	1	1	1	1	1	1	1	1	1	1	1	1	1	1	1	1	1	1	1	1	1	1	12	15	0	15	7	0	6	45	2	2	2	2	1	1	3	1	1
12950409189	1	4	1	2	1	1	2	1	3	2	2	2	2	1	1	1	3	2	2	1	1	2	1	2	2	2	2	2	2	2	2	2	10	15	0	15	6	30	7	0	3	4	3	1	1	1	2	2	2
12947992049	3	4	4	3	2	3	1	1	3	3	2	2	1	1	1	2	3	1	1	1	2	2	1	3	1	1	2	1	3	2	2	3	11	45	0	20	7	45	7	30	3	4	4	4	1	1	3	3	3
12947554164	2	2	2	2	1	1	2	2	1	2	1	1	1	3	1	2	1	1	1	1	1	1	1	1	1	1	1	1	1	1	1	1	11	0	0	15	6	30	6	30	2	2	2	1	1	1	1	1	1
12947394044	3	1	1	1	2	2	1	1	1	1	1	1	1	1	2	1	2	2	1	1	1	2	1	2	2	1	1	1	1	1	1	1	2	0	0	10	12	0	7	0	3	4	2	1	2	2	2	2	2
12947339385	3	3	3	3	3	3	2	1	2	1	1	1	1	1	1	1	1	1	1	1	1	1	1	1	1	1	1	1	1	1	1	1	12	15	0	10	8	30	8	0	2	2	3	1	1	1	3	1	3
13008684883	3	2	4	4	1	1	1	1	1	2	2	2	1	1	3	4	1	1	1	2	2	2	1	2	2	2	2	2	2	2	1	1	12	30	2	30	8	0	4	0	4	3	3	1	1	1	1	2	2
12953188385	2	2	3	3	1	1	1	3	2	2	1	1	1	1	1	2	1	1	1	2	1	1	1	2	1	1	1	1	2	1	1	2	12	30	0	5	6	30	5	30	2	3	3	1	2	1	1	1	2
12950217038	2	1	2	2	1	1	1	1	1	2	1	1	1	1	1	1	3	1	1	1	1	1	1	1	1	1	1	1	1	1	1	2	11	0	0	5	6	45	7	0	1	2	2	1	1	1	1	2	2
12947713362	3	3	3	4	3	2	3	1	2	2	1	1	1	1	1	2	1	1	1	1	1	1	1	1	2	2	2	1	1	2	1	1	3	0	0	0	9	0	6	0	1	1	1	1	1	1	1	1	2
12900862342	3	2	3	3	2	1	1	1	2	2	1	2	2	1	1	2	2	1	1	1	1	2	1	2	1	1	1	1	2	2	1	1	12	30	0	30	5	30	5	0	2	4	3	1	3	2	1	2	1
12900081565	3	3	3	3	2	1	2	1	3	2	3	2	2	1	1	3	3	1	1	1	1	2	1	3	1	2	2	1	2	3	2	1	10	0	0	10	5	30	7	0	2	3	4	1	2	1	3	3	3
12952992688	3	3	4	4	2	2	3	1	3	4	3	2	2	4	1	2	1	1	1	1	1	1	1	2	1	1	1	1	1	1	1	2	21	30	0	10	7	30	9	0	3	2	3	1	1	1	1	1	1
12950335010	4	1	1	1	1	3	1	1	1	1	1	1	1	1	1	1	1	1	1	1	1	1	1	1	1	1	1	1	1	1	1	1	1	30	0	10	8	30	7	0	1	1	1	1	1	1	1	2	1
12949780400	4	1	2	2	1	2	3	1	2	1	1	1	1	1	1	1	1	1	1	1	1	1	1	1	1	1	1	1	1	1	1	1	12	30	0	15	8	30	8	0	1	2	2	1	1	1	3	1	1
12949856595	1	1	2	3	1	1	1	1	2	3	1	1	1	1	1	1	1	1	1	1	1	2	1	1	1	1	1	1	1	1	1	1	11	30	0	15	6	0	6	0	2	2	1	1	1	1	1	2	1
12947729569	3	3	4	3	3	2	3	1	3	4	4	3	3	3	4	4	2	4	2	1	3	4	3	4	4	3	4	4	4	4	3	4	11	0	1	20	6	30	3	30	4	4	3	4	4	4	4	2	4
12948339653	3	4	4	4	3	2	4	3	4	4	3	2	3	2	1	2	2	1	2	1	1	2	1	2	1	2	1	1	1	2	1	1	0	50	0	9	9	30	6	30	1	2	2	1	3	2	2	3	2
12949822493	2	4	1	4	3	1	1	1	3	1	1	1	1	1	1	1	1	1	1	1	1	1	1	1	1	1	1	1	1	1	1	1	12	0	0	10	7	15	6	50	2	3	3	1	1	1	1	2	1
12947769585	3	2	3	3	1	2	2	1	2	2	1	1	1	1	1	1	2	2	1	1	2	2	1	2	1	1	1	1	2	2	1	1	10	30	0	10	6	0	6	30	1	2	3	1	1	1	1	1	1
12947352133	2	1	1	2	1	1	1	1	2	2	1	1	1	1	1	1	1	1	1	2	2	1	1	1	1	1	1	1	1	1	1	1	12	30	0	0	7	15	6	30	1	2	1	1	1	1	3	1	2
13013048007	3	2	3	3	1	1	1	1	3	4	1	1	1	1	3	3	1	1	1	1	1	1	1	2	1	2	1	1	1	1	1	1	11	30	0	30	6	30	6	0	3	3	3	1	1	1	3	1	1
13013268767	3	1	2	1	1	3	1	1	1	1	3	2	1	1	1	1	2	2	1	1	1	1	1	2	1	1	1	2	1	1	1	1	11	0	0	1	6	0	6	30	1	3	2	1	1	1	3	1	1
13009226934	2	2	2	2	1	2	3	1	1	1	1	1	1	1	1	1	1	1	1	1	1	1	1	1	1	1	1	1	1	1	1	1	2	30	0	10	9	0	6	20	1	1	1	1	1	1	1	1	1
12899881677	2	2	4	4	1	1	2	1	2	1	1	1	1	1	1	5	1	1	1	1	1	1	1	2	1	1	1	1	1	2	1	3	11	30	0	10	6	30	7	0	2	1	3	2	4	3	3	3	1
12949912294	3	1	1	1	1	3	1	1	1	3	2	1	1	1	1	1	1	2	1	1	1	1	1	2	1	1	1	1	1	1	1	2	11	30	0	5	6	30	6	0	1	2	2	1	1	2	2	1	1
13018905388	4	4	4	4	3	3	3	4	3	3	4	4	3	3	4	3	4	3	1	2	1	2	2	2	3	1	1	3	3	4	2	3	1	30	0	6	8	0	5	0	4	3	3	1	1	1	2	1	1
12905799297	3	1	1	3	2	1	1	1	1	1	1	1	1	1	1	1	1	1	1	1	1	1	1	1	1	3	1	1	1	1	1	1	0	0	0	30	7	40	7	0	2	1	2	1	1	1	2	1	1
12900087970	3	3	4	5	5	4	4	2	5	3	4	4	4	4	5	4	4	4	3	3	4	4	4	4	4	2	4	4	3	3	3	3	1	0	1	30	9	0	6	30	4	3	3	2	2	3	3	4	2
12899929989	2	1	1	3	1	2	1	2	2	2	1	1	2	1	1	3	2	1	1	1	1	1	1	2	1	1	1	1	1	2	1	1	12	30	0	10	7	0	6	0	2	4	3	1	1	1	1	2	1
13010371033	3	4	3	3	2	2	3	1	2	3	2	1	1	1	1	2	2	1	1	1	1	2	1	2	1	2	1	1	1	2	1	1	11	0	0	15	7	45	8	0	2	3	4	1	1	3	1	3	1
13008327231	5	2	5	5	3	5	3	2	3	3	3	3	3	3	4	2	3	3	2	1	1	3	3	2	3	3	3	3	4	4	3	2	11	0	0	30	6	0	6	30	3	3	3	1	1	2	1	3	1
12947625462	3	1	3	4	1	1	1	1	2	5	4	4	4	3	3	4	5	2	1	1	3	5	1	5	2	2	3	3	1	1	1	1	11	0	0	10	7	0	8	0	2	2	2	1	2	1	1	4	4
13016108489	3	3	3	3	3	3	3	3	3	3	3	3	3	3	3	3	3	3	3	3	3	3	3	3	3	3	3	3	3	3	3	3	2	0	0	10	7	30	5	0	2	2	2	2	1	1	4	2	2
12900062118	1	1	2	3	1	1	1	1	1	1	1	1	1	1	1	1	1	1	1	1	1	1	1	1	1	1	1	1	1	1	1	1	1	0	0	10	5	30	4	0	1	4	1	1	4	1	1	1	1
12900006127	3	2	2	4	2	1	1	4	2	3	1	1	1	1	2	2	1	1	1	1	1	1	1	1	2	1	1	1	1	1	2	1	1	0	0	20	8	15	6	40	2	1	1	1	1	2	1	1	1
12905639018	3	2	2	2	2	2	2	1	1	3	2	1	1	1	1	3	2	1	1	1	1	2	1	2	1	1	1	1	1	1	1	1	12	0	0	0	7	30	7	30	1	2	2	1	1	1	1	2	1
12949850183	1	1	2	3	2	1	1	1	1	2	1	1	1	1	1	2	1	1	1	2	1	2	1	3	1	2	2	1	1	1	1	1	0	0	0	1	6	0	5	55	1	2	1	1	1	1	1	1	1
12900054590	2	2	2	3	1	1	1	1	1	1	2	2	1	1	2	3	2	2	1	1	1	2	1	2	1	2	1	2	1	1	2	2	12	0	0	30	9	30	6	30	4	4	2	1	1	3	3	4	1
12960078024	3	3	3	3	3	2	1	1	3	5	3	2	2	1	2	2	1	2	1	1	1	1	2	2	2	1	2	2	2	2	2	2	12	30	0	10	6	30	6	0	1	2	1	1	1	1	1	1	1
12955783893	2	2	3	3	2	3	1	1	2	3	2	1	1	1	2	2	2	3	1	3	2	2	2	3	3	2	3	3	2	2	2	4	1	30	0	45	7	30	4	30	4	3	3	1	3	2	2	1	1
12914350310	2	1	1	3	1	1	1	1	1	2	1	1	1	1	1	1	2	1	1	1	1	1	1	2	1	1	1	1	1	2	1	1	12	0	0	30	8	0	7	30	2	1	1	1	3	1	1	1	1
12901516372	3	4	4	4	3	2	4	1	3	3	3	3	3	2	2	4	2	1	1	1	1	2	1	2	2	1	2	1	1	2	1	1	1	0	0	5	7	30	5	30	1	1	1	1	1	1	1	1	1
12900463501	2	2	3	4	1	1	1	1	1	2	2	3	1	1	2	1	1	1	1	1	1	2	1	2	2	1	2	2	2	1	1	2	2	0	0	5	8	0	6	0	1	4	1	1	1	2	1	1	1
12869030594	2	3	3	3	2	1	1	2	2	3	3	2	2	1	2	2	1	3	1	1	1	2	3	2	2	1	1	3	2	2	2	1	0	0	0	15	8	15	7	45	2	2	4	1	1	1	1	2	1
13011871820	2	1	2	3	1	1	1	1	2	2	1	1	1	1	1	1	1	1	1	1	1	1	1	2	1	1	1	1	1	1	1	1	12	0	1	0	6	30	5	0	3	1	1	1	1	1	1	1	1
12900059312	4	2	4	3	1	1	1	1	1	2	1	1	2	1	1	2	1	1	1	1	1	1	1	1	1	1	1	1	1	1	1	1	12	30	1	0	8	30	6	0	4	4	2	1	1	1	1	1	1
12902730890	2	3	2	4	1	1	2	1	1	1	2	2	1	1	1	2	1	2	1	1	1	1	1	2	1	1	1	1	2	2	1	2	2	0	0	10	7	10	5	0	1	3	1	1	1	1	1	1	1
12902697923	2	1	2	3	2	2	1	1	2	2	1	1	1	1	1	2	1	1	1	1	1	1	1	2	1	1	1	1	1	1	1	1	0	30	0	5	6	30	5	30	1	1	1	1	1	1	3	1	1
12899939455	5	4	4	4	4	5	4	4	4	4	5	4	4	4	5	4	4	4	3	4	3	5	3	4	5	4	5	5	5	5	5	5	11	0	1	50	7	0	7	0	4	4	3	3	4	1	3	2	3
13167358677	3	4	3	3	3	2	2	3	1	3	2	1	1	1	3	2	1	2	1	1	1	3	1	3	3	1	3	1	4	4	1	1	23	20	0	30	7	5	0	390	3	3	3	1	3	3	2	3	4
12900943623	3	3	2	5	3	5	2	5	3	4	3	3	3	2	3	4	3	3	1	1	2	3	2	2	2	1	2	2	2	2	1	1	11	30	0	2	5	30	6	0	3	1	1	2	3	2	1	3	2
12949618726	2	3	3	4	1	2	3	2	2	3	2	3	2	1	1	2	2	2	2	1	1	2	1	2	1	1	3	1	3	1	1	2	12	0	0	15	6	0	6	0	2	3	3	1	3	3	4	3	1
13008575798	4	3	4	4	4	4	4	4	3	4	4	4	4	4	3	4	4	4	4	4	4	4	4	3	4	4	4	3	4	4	4	4	1	15	0	10	7	0	6	0	3	3	3	2	3	3	3	3	2
12899977312	2	1	2	3	1	1	3	1	2	4	1	1	2	1	1	2	2	1	1	1	1	2	1	4	2	3	1	1	1	2	1	1	12	30	0	15	6	30	5	0	1	3	1	1	1	1	1	1	1
12947665700	3	1	5	5	1	5	1	1	3	5	1	1	1	1	2	2	1	1	1	1	2	1	1	1	2	2	1	1	1	2	1	1	24	0	0	30	8	0	7	0	1	4	2	1	1	1	4	3	1
13013062095	4	3	4	4	3	3	3	3	4	4	3	4	3	2	4	3	3	3	2	2	2	2	2	3	3	2	3	2	2	2	2	3	1	30	0	5	6	25	4	30	1	4	3	3	3	4	3	3	4
12900296325	3	3	5	4	3	1	3	3	4	2	5	4	2	1	2	3	3	3	3	3	2	1	2	1	5	1	4	4	2	5	3	5	12	45	0	10	10	0	10	0	3	4	4	1	3	2	3	3	1
12952738609	4	3	3	3	2	2	2	4	3	3	4	3	4	3	4	4	4	3	3	2	2	3	3	3	4	3	3	3	3	3	3	4	12	0	0	10	5	30	5	0	2	4	2	2	4	2	3	4	3
12899987502	3	2	3	4	2	2	2	2	3	5	4	2	2	2	2	4	3	2	2	1	2	2	1	2	1	2	1	2	3	2	2	2	1	0	0	5	7	45	6	0	2	2	1	1	1	1	1	2	1
12947762609	4	3	4	5	3	2	3	1	3	3	3	3	3	2	2	2	4	3	1	1	1	1	1	1	2	3	1	2	2	4	2	1	12	0	0	10	7	15	6	0	1	1	3	1	4	1	1	3	4
13015718747	3	3	4	4	3	3	3	3	3	3	4	3	2	2	2	2	2	2	2	2	3	3	2	2	2	2	2	2	2	2	2	2	12	0	0	15	6	50	6	0	3	3	3	2	2	2	3	1	1
12900300974	3	2	4	4	1	2	2	1	3	1	5	5	3	3	2	2	1	2	1	5	4	3	3	3	1	1	1	3	5	5	2	4	1	0	0	30	5	50	4	0	1	3	1	1	4	1	3	2	3
12900119508	1	1	2	2	1	2	2	1	2	1	1	1	1	2	1	2	2	1	1	1	1	1	1	2	2	1	1	1	1	1	1	2	1	0	0	1	10	0	10	0	1	3	3	1	3	1	2	1	1
13185559979	3	4	4	4	3	5	3	3	3	4	3	3	3	2	2	2	2	2	2	3	2	3	1	3	3	2	3	3	3	3	2	2	3	30	0	2	8	0	4	0	2	3	3	1	3	3	2	2	2
12952788474	3	4	3	4	2	2	2	2	2	3	2	2	2	1	2	2	1	2	1	1	1	1	1	1	2	1	1	1	1	1	2	1	11	30	0	10	6	0	6	0	2	3	1	1	1	2	3	1	2
12905804069	3	1	3	3	1	3	3	2	1	3	2	1	1	1	1	2	2	2	1	1	1	2	2	2	1	2	1	2	1	1	1	2	2	0	0	15	6	18	4	0	1	4	4	1	2	1	1	1	1
12900097836	4	4	3	3	1	5	3	4	3	3	3	4	3	2	3	4	3	3	3	4	3	2	3	3	3	3	3	4	4	4	4	3	3	30	0	30	12	30	7	30	3	3	2	2	4	2	4	4	1
13019779921	3	1	2	2	1	4	3	1	2	4	1	1	2	1	1	4	1	1	1	1	1	2	1	1	2	3	3	1	1	3	2	1	1	0	0	30	9	0	6	0	3	2	1	1	1	1	1	4	1
12952927113	3	3	3	4	4	3	4	1	4	4	5	3	4	1	5	3	4	3	1	3	1	3	3	3	2	1	4	3	1	4	3	1	11	0	0	15	7	0	6	0	3	4	3	1	4	3	2	2	4
12950269477	3	3	3	3	3	2	4	3	2	2	2	2	2	1	1	2	1	1	1	1	1	2	1	2	1	2	1	1	1	1	1	1	23	0	0	30	6	30	7	0	2	3	2	4	4	2	4	1	2
13017169960	3	2	3	4	2	2	2	1	2	3	3	2	2	1	1	1	1	1	1	1	1	1	1	1	1	1	2	1	2	2	2	2	1	0	0	5	8	30	6	30	1	1	2	1	1	1	1	1	1
12950049819	1	1	2	2	1	1	2	1	1	2	1	1	1	1	1	1	1	1	1	1	1	2	1	2	2	1	1	1	1	2	3	1	12	30	0	5	9	0	8	0	1	3	3	1	1	1	3	1	1
12949768123	3	3	2	4	1	1	1	1	4	5	3	3	3	2	1	5	4	1	1	1	2	3	1	4	2	1	2	1	1	1	1	2	12	30	0	5	8	0	7	0	1	3	3	1	1	1	1	1	1
12949702600	2	1	1	3	1	1	1	1	1	1	1	1	1	1	1	2	1	1	1	1	1	1	1	1	1	1	1	1	1	1	1	1	10	30	0	5	6	30	7	0	1	1	3	1	1	1	1	1	4
12900296056	3	4	4	3	3	2	4	4	3	3	2	3	2	2	2	4	3	2	1	4	1	2	1	2	3	1	2	2	3	4	1	2	2	0	0	30	9	0	6	30	3	2	2	1	2	1	2	1	2
12947420672	3	2	2	2	1	2	1	2	1	1	1	1	1	1	1	2	2	1	1	1	1	1	1	3	1	1	1	1	1	2	1	1	10	0	0	15	7	0	4	0	3	4	3	1	1	1	1	2	3
13008171176	1	2	2	1	1	1	1	2	1	1	1	1	1	1	1	1	1	1	1	1	1	1	1	2	1	1	1	1	1	1	1	1	2	0	0	2	6	0	4	0	1	2	1	1	1	2	1	1	1
12949822303	1	1	2	2	1	2	1	1	2	1	1	1	1	1	1	1	1	1	1	1	1	1	1	1	1	2	1	1	1	1	1	3	12	30	0	3	6	45	6	15	1	4	4	1	1	1	1	1	1
13014311821	3	2	1	3	1	2	1	1	3	3	1	1	2	1	1	2	1	1	1	1	1	1	1	3	1	1	1	1	1	1	1	1	11	30	0	30	5	55	5	0	2	1	2	1	1	2	1	1	1
13010383748	2	2	3	1	1	1	2	2	3	2	2	1	1	1	1	1	2	1	1	1	1	2	1	2	1	2	1	1	1	1	1	1	11	0	0	15	6	5	7	10	2	3	3	3	3	3	4	2	1
12953303621	3	2	3	3	2	1	2	1	3	2	2	2	2	4	2	2	2	2	2	2	2	2	2	2	2	2	2	3	2	3	3	2	10	0	0	5	5	0	6	0	3	3	4	2	2	2	2	3	2
12953152468	1	3	4	4	4	1	1	5	3	4	4	3	3	2	4	2	3	3	2	1	2	3	2	2	2	4	1	2	3	2	2	3	11	30	1	30	9	0	6	0	4	3	3	1	2	1	2	2	2
12950169248	2	1	2	2	3	2	1	1	2	3	2	2	2	1	1	2	1	1	1	1	2	1	1	1	1	2	1	1	1	1	1	1	11	0	0	106	6	45	4	30	1	2	2	1	1	1	1	2	1
12949853900	2	1	3	3	1	2	1	1	3	1	1	1	1	1	1	1	1	1	1	1	1	1	1	1	1	3	1	1	1	1	1	1	11	45	0	10	6	45	6	0	1	4	4	1	3	1	1	1	1
13008211116	3	3	4	4	4	4	3	2	2	5	4	3	4	3	4	2	3	2	1	1	2	1	2	3	4	2	2	3	4	4	3	2	11	30	0	30	7	30	5	30	3	4	4	1	1	1	2	2	4
13011524973	1	2	2	1	1	1	2	1	3	2	2	1	1	2	2	2	1	1	1	1	2	1	1	2	1	2	1	1	1	1	1	2	10	30	0	15	7	0	6	0	1	3	3	1	3	1	1	2	1
[truncated: 34 more columns]
